# Supplementary material for: Outpatient palliative care referral system (PCRS) for patients with advanced cancer: an impact evaluation protocol
Source: PubMed Central journal article supplement — BMJ Open. 2022 Oct 28;12(10):e059410. doi: 10.1136/bmjopen-2021-059410 (PMC9621186; doi:10.1136/bmjopen-2021-059410), 2022-10-28
Supplement: bmjopen-2021-059410.draft_revisions.pdf [file bmjopen-2021-059410.draft_revisions.pdf]

# BMJ Open

BMJ Open is committed to open peer review. As part of this commitment we make the peer review history of every article we publish publicly available.

When an article is published we post the peer reviewers' comments and the authors' responses online. We also post the versions of the paper that were used during peer review. These are the versions that the peer review comments apply to.

The versions of the paper that follow are the versions that were submitted during the peer review process. They are not the versions of record or the final published versions. They should not be cited or distributed as the published version of this manuscript.

BMJ Open is an open access journal and the full, final, typeset and author-corrected version of record of the manuscript is available on our site with no access controls, subscription charges or pay-per-view fees (<http://bmjopen.bmj.com>).

If you have any questions on BMJ Open's open peer review process please email [info.bmjopen@bmj.com](mailto:info.bmjopen@bmj.com)

# BMJ Open

## Outpatient Palliative Care Referral System (PCRS) for patients with advanced cancer. An impact evaluation protocol.

|                               |                                                                                                                                                                                                                                                                                                                                                                                                                                                                                                                                                                                                                                                                                                                                                                                                                                                                                                                                                                                                                                                                                                                                                                                                                                                                                                                                                                                                                                                                                                                             |
|-------------------------------|-----------------------------------------------------------------------------------------------------------------------------------------------------------------------------------------------------------------------------------------------------------------------------------------------------------------------------------------------------------------------------------------------------------------------------------------------------------------------------------------------------------------------------------------------------------------------------------------------------------------------------------------------------------------------------------------------------------------------------------------------------------------------------------------------------------------------------------------------------------------------------------------------------------------------------------------------------------------------------------------------------------------------------------------------------------------------------------------------------------------------------------------------------------------------------------------------------------------------------------------------------------------------------------------------------------------------------------------------------------------------------------------------------------------------------------------------------------------------------------------------------------------------------|
| Journal:                      | <i>BMJ Open</i>                                                                                                                                                                                                                                                                                                                                                                                                                                                                                                                                                                                                                                                                                                                                                                                                                                                                                                                                                                                                                                                                                                                                                                                                                                                                                                                                                                                                                                                                                                             |
| Manuscript ID                 | bmjopen-2021-059410                                                                                                                                                                                                                                                                                                                                                                                                                                                                                                                                                                                                                                                                                                                                                                                                                                                                                                                                                                                                                                                                                                                                                                                                                                                                                                                                                                                                                                                                                                         |
| Article Type:                 | Protocol                                                                                                                                                                                                                                                                                                                                                                                                                                                                                                                                                                                                                                                                                                                                                                                                                                                                                                                                                                                                                                                                                                                                                                                                                                                                                                                                                                                                                                                                                                                    |
| Date Submitted by the Author: | 29-Nov-2021                                                                                                                                                                                                                                                                                                                                                                                                                                                                                                                                                                                                                                                                                                                                                                                                                                                                                                                                                                                                                                                                                                                                                                                                                                                                                                                                                                                                                                                                                                                 |
| Complete List of Authors:     | Brunelli, Cinzia; Fondazione IRCCS Istituto Nazionale Tumori Milan Zecca, Ernesto; Fondazione IRCCS Istituto Nazionale dei Tumori, Pigni, Alessandra; Fondazione IRCCS Istituto Nazionale dei Tumori Bracchi, Paola; Fondazione IRCCS Istituto Nazionale dei Tumori Caputo, Mariangela; Fondazione IRCCS Istituto Nazionale dei Tumori Lo Dico, Silvia; Fondazione IRCCS Istituto Nazionale dei Tumori Fusetti, Viviana; Fondazione IRCCS Istituto Nazionale dei Tumori Tallarita, Antonino; Fondazione IRCCS Istituto Nazionale dei Tumori, Bergamini, Cristiana; Fondazione IRCCS Istituto Nazionale dei Tumori, Medical Oncology Department Brambilla, Marta; Fondazione IRCCS Istituto Nazionale dei Tumori, Medical Oncology Department Raimondi, Alessandra; Fondazione IRCCS Istituto Nazionale dei Tumori, Medical Oncology Department Niger, Monica; Fondazione IRCCS Istituto Nazionale dei Tumori Provenzano, Salvatore; Fondazione IRCCS Istituto Nazionale dei Tumori, Medical Oncology Department Sepe, Pierangela; Fondazione IRCCS Istituto Nazionale dei Tumori, Medical Oncology Department Alfieri, Sara; Fondazione IRCCS Istituto Nazionale dei Tumori Tinè, Gabriele; Fondazione IRCCS Istituto Nazionale dei Tumori De Braud, Filippo; Fondazione IRCCS Istituto Nazionale dei Tumori, Medical Oncology Department; Università degli Studi di Milano Caraceni, A; Fondazione IRCCS Istituto Nazionale dei Tumori, Palliative Care, Pain Therapy and Rehabilitation; Università degli Studi di Milano |
| Keywords:                     | Adult palliative care < PALLIATIVE CARE, Adult oncology < ONCOLOGY, QUALITATIVE RESEARCH                                                                                                                                                                                                                                                                                                                                                                                                                                                                                                                                                                                                                                                                                                                                                                                                                                                                                                                                                                                                                                                                                                                                                                                                                                                                                                                                                                                                                                    |
|                               |                                                                                                                                                                                                                                                                                                                                                                                                                                                                                                                                                                                                                                                                                                                                                                                                                                                                                                                                                                                                                                                                                                                                                                                                                                                                                                                                                                                                                                                                                                                             |

SCHOLARONE™  
Manuscripts

1  
2  
3 **Outpatient Palliative Care Referral System (PCRS) for patients with advanced cancer. An**  
4 **impact evaluation protocol.**  
5  
6  
7

8 Cinzia Brunelli<sup>1\*</sup>, Ernesto Zecca<sup>1\*</sup>, Alessandra Pigni<sup>1</sup>, Paola Bracchi<sup>1</sup>, Mariangela Caputo<sup>1</sup>, Silvia  
9 Lo Dico<sup>1</sup>, Viviana Fusetti<sup>1</sup>, Antonino Tallarita<sup>1</sup>, Cristiana Bergamini<sup>2</sup>, Marta Brambilla<sup>2</sup>,  
10 Alessandra Raimondi<sup>2</sup>, Monica Niger<sup>2</sup>, Salvatore Provenzano<sup>2</sup>, Pierangela Sepe<sup>2</sup>, Sara Alfieri<sup>3</sup>,  
11 Gabriele Tinè<sup>4</sup>, Filippo De Braud<sup>2,5</sup> and Augusto Caraceni<sup>1,5</sup>  
12  
13  
14  
15

16 \* Equally first Authors  
17  
18  
19

20 <sup>1</sup> Palliative care, Pain Therapy and Rehabilitation Unit, Fondazione IRCCS Istituto Nazionale dei Tumori,  
21 Milan, Italy.

22 <sup>2</sup> Medical Oncology Department, Fondazione IRCCS Istituto Nazionale dei Tumori, Milan, Italy.

23 <sup>3</sup> Clinical Psychology Unit, Fondazione IRCCS Istituto Nazionale dei Tumori, Milan, Italy.

24 <sup>4</sup> Unit of Clinical Epidemiology and Trial Organisation, Fondazione IRCCS Istituto Nazionale dei Tumori,  
25 Milan, Italy.

26 <sup>5</sup> Università degli Studi di Milano , Milan, Italy.  
27  
28  
29  
30  
31  
32

33 **Corresponding author**

34 Ernesto Zecca, MD

35 Palliative care, Pain Therapy and Rehabilitation Unit,

36 Fondazione IRCCS Istituto Nazionale dei Tumori

37 via Venezian, 1- 20133 Milano, Italy

38 ernesto.zecca@istitutotumori.mi.it  
39  
40  
41  
42  
43

44 **Key words:**

45 early outpatient palliative care, advanced cancer, referral, oncology palliative care integration  
46  
47  
48  
49  
50  
51  
52  
53  
54  
55  
56  
57  
58  
59  
60

## Abstract

### Objectives

Early palliative care (EPC) in the clinical pathway of advanced cancer patients improves symptom control, quality of life and has a positive impact on overall quality of care. At present, standardized criteria for appropriate referral for EPC in oncology care are lacking. The aim of this project is to develop a set of standardized referral criteria and procedures to implement appropriate EPC for advanced cancer patients (the Palliative Care Referral System) and test its impact on user perception of quality of care received, on patient quality of life and on the use of healthcare resources.

**Setting.** Selected oncology clinics and the palliative care outpatient clinic will participate in the study.

**Method.** A scoping literature review and an expert consultation through a nominal group technique will be used to revise existing referral tools and to develop a new one. 25 patients will be enrolled in a pilot study to assess feasibility of the implementation of PCRS; 10 interviews with patients and health care professionals will be carried out to evaluate applicability.

**Intervention.** A pretest-posttest quasi-experimental study involving 150 patients before implementation of the PCRS and 150 patients after implementation will be used.

**Outcome.** Patient satisfaction with care received, quality life and use of resources; caregiver satisfaction with care will also be assessed to explore the impact of the intervention.

**Conclusion.** Our hypothesis is that the use of tools for standardized PC referral criteria can extend the benefits of improved care quality and efficient resources use to a wider population of frail patients. The timely identification of patients with terminal illness who can benefit from PC will likely promote “end-of-life” care approaches avoiding medical overtreatment, futile diagnostic examinations and access to acute care facilities.

**Trial Registration.** The pretest-posttest trial was registered on ClinicalTrials.gov database (NCT04936568).

#### Strengths and limitations of this study

- this project aims at developing and implementing a palliative care referral system (PCRS) developed on the basis of published evidence and consensus between oncology and palliative care professionals.
- the pre and post implementation study design will provide evidence on the feasibility of the PCRS and its impact on user experience of care, patient quality of life and use of health care resources.
- Ideally, a randomized trial would provide higher value evidence; however an individually randomized design may not be adequate due to the high risk of contamination typical of complex intervention studies. On the other hand a cluster randomized trial would limit contamination but should involve at least 6-8 first level units or hospitals for the results to be robust, and this was beyond the resources allocated to this preliminary phase research.

## Introduction

Palliative care (PC) is aimed at reducing or preventing suffering and improving quality of life for patients affected by incurable advanced illnesses and their caregivers. Traditionally PC has been limited to the terminal phase of illness with an unclear impact on overall disease trajectory. In recent years the term “early palliative care” (EPC) has been coined to describe an anticipated approach to PC in the care pathway of advanced diseases. In the case of advanced cancer, this means that PC can already start along with treatments such as chemotherapy, radiotherapy and other disease modifying interventions, planned for the management of advanced disease [1].

According to the latest American Society of Clinical Oncology (ASCO) consensus on integration of PC into standard oncology care, PC is defined early when administered within eight weeks from the diagnosis of advanced cancer, a definition that is too generic to be operationally implemented [2]. As shown in systematic literature reviews [1] randomized controlled trials demonstrate that the introduction of outpatient PC from the time of diagnosis of advanced cancer is associated with benefit on several clinical and care dimensions [1].

On the other hand, EPC is associated with less aggressive cancer treatment at the end of life, such as reduced use of chemotherapy in the last weeks of life and reduced access to intensive care units and emergency rooms [3].

Despite the evidence on the benefit of EPC, there is no standard definition of how oncologists should decide to refer patients to the PC specialist once advanced or metastatic disease is diagnosed. To optimize the potential impact of EPC on the overall care pathway, it would be important to combine the capacity of PC teams to participate timely in the shared decision-making process (including patient, family and attending oncologist), and, at the same time, the capacity of the multidisciplinary oncology team to integrate the advice of the PC specialist [4].

Without a suitable patient selection process for palliative care referral, outpatient palliative care services may be overwhelmed by excessive and perhaps inappropriate requests or, alternatively, resources could be underutilised if referrals do not occur. At present the volume and timing of referral to outpatient PC for cancer patients vary widely among services. This can be in part explained by the lack of standardized referral criteria for outpatient PC, coupled with variable oncologists’ attitudes and beliefs about PC and differences in models and availability of PC services [4].

It would be desirable to provide a personalized care plan for each patient, taking into account different diseases trajectories and identifying the timing and the ways in which patients can be

referred to PC. Criteria establishing the right moment for the right patient for referral including are needed to personalize care pathways and optimize resource allocations to improve care outcomes.

This project has a twofold aim:

1. To develop and study the feasibility of a standardized palliative care referral system (PCRS) for outpatient PC in advanced cancer patients.
2. To evaluate the impact of routine application of the PCRS in a population of patients cared for in a comprehensive cancer centre. Study outcomes will be patient's satisfaction with care, quality of life, caregiver's satisfaction with care and use of health care resources.

## Methods

The project has been organized into two main sequential phases and second level steps as reported in Figure 1. The study intervention will be applied within several selected oncology clinics covering both frequent and rare cancers (lung, gastrointestinal, genitourinary, head & neck and sarcoma) and the PC outpatient clinic. In our palliative care clinic patients regularly encounter palliative care specialists and are assessed by nurses for symptoms and psychosocial dimension with standardized validated patient reported outcome measurements. Psychological consult is also available as needed. For each oncology clinic one oncologist will participate directly in the study procedures.

- Insert Figure 1 around here -

### Phase I: Development and pilot testing of the PCRS

Criteria used for PC referral in advanced cancer patients will be identified through a scoping review of the literature on existing PC needs screening tools and methods (Table 1). The choice of the criteria that will constitute the PCRS will be based on their clinical relevance and prognostic value; existing criteria will be modified if needed. A first draft of the PCRS tool will be developed and its appropriateness and feasibility in routine clinical practice will be evaluated using Nominal group technique (NGT) [5] carried out with different health care providers (oncologists, PC specialists, nurses and psychologist) with extensive experience in oncology and palliative care. NGT is a qualitative research methodology aimed at verifying the possible convergence of a group of experts on an idea, judgment or proposal. NGT consists of six stages [6]: 1. Presentation of the nominal question; 2. Individual generation of ideas or voting; 3. Round-robin feedback from participants to record each idea/voting; 4. Group discussion of each idea/voting in turn for

1  
2  
3 clarification and evaluation; 5. Individual voting on priority ideas with the group decision derived  
4 through rank-ordering or rating; 6. Sharing of results, further discussion and re-voting. Based on the  
5 NGT results, the PCRS will be adjusted/modified as needed and standard implementation  
6 procedures will be developed.  
7  
8

9  
10 Then a pilot cross-sectional feasibility study on the application of the PCRS will be carried  
11 out on 5 consecutive patients in each of the 5 outpatient clinics that will be involved in the Phase II  
12 of the project. Feasibility assessment will include: time needed to screen the patient, number of  
13 patients for which the screening was complete, number of missing data for each criterion.  
14 Acceptability of PCRS by patients and by health care professionals (HCPs), as well as integration of  
15 the assessment procedure with routine clinical practice will also be evaluated through debriefing  
16 interviews with 5 patients and 5 HCPs. A final revision of the PCRS and of its implementation  
17 procedure by the study group will follow the pilot testing.  
18  
19  
20  
21  
22  
23  
24

## 25 **Phase II: PCRS impact evaluation.**

26  
27 The potential impact of the PCRS will be explored using a quasi-experimental study design  
28 measuring study endpoints before and after PCRS implementation (Figure1).  
29

### 30 Study design and patient population

31  
32 A longitudinal pretest-posttest design will be carried out. Two different cohorts of advanced  
33 cancer patients will be enrolled before (pretest) and after (posttest) the introduction of the PCRS in  
34 outpatient clinics. Patient inclusion criteria are: age >18 years; diagnosis of inoperable locally  
35 advanced and/or metastatic cancer. Exclusion criteria: eligibility to anticancer treatment with  
36 curative intent; patients already enrolled in a PC program; cognitive impairment.  
37  
38  
39  
40  
41  
42

### 43 Study Outcomes and assessment methods

44 The following outcomes will be evaluated: patient's satisfaction with care (main outcome), patient's  
45 quality of life, caregiver's satisfaction with care, use of health care resources, and end of life care  
46 quality indicators.  
47  
48

49 The FAMCARE-P13 will be used to assess patient satisfaction with care in the present  
50 study. It is a 13 item self-report questionnaire, developed to be used with advanced cancer patients  
51 [7]. Its items are rated from 1 (very dissatisfied) to 5 (very satisfied) producing a single satisfaction  
52 score ranging from 13 to 65.  
53  
54  
55

56 The EORTC Quality of Life Questionnaire Core 15 for Palliative Care (QLQ-C15-PAL) [8]  
57 will be used to evaluate patients' quality of life. QLQ-C15-PAL is an abbreviated 15-item version  
58  
59  
60



1  
2  
3 of EORTC-QLQC30 specifically developed for use in a palliative care setting. It includes two  
4 multi-item functional scales (physical and emotional functioning), two multi-item symptom scales  
5 (fatigue and pain), five single-item symptom scales (nausea/vomiting, dyspnoea, insomnia, appetite  
6 loss and constipation) and a question regarding overall QoL (global health status). Items are rated  
7  
8 on a Likert scale from 1 (not at all) to 4 (very much) with the exception of global health status,  
9  
10 which is rated from 1 (very poor) to 7 (excellent).  
11  
12

13  
14 Family satisfaction with care will be assessed with the FAMCARE scale [9, 10]. It is a self-  
15 assessment satisfaction composed of 20 items rated according to a 5-point Likert scale from 1 (very  
16 satisfied) to 5 (very dissatisfied). The items are grouped into four subscales: Physical patient care  
17 (PPC), Information giving (IG), Availability of care (AC) and Psychosocial care (PsC) subscale.  
18  
19 The FAMCARE Scale can be administered to family members while a patient is receiving palliative  
20 care or at some point after a patient's death.  
21  
22

23  
24 All tools applied are validated in Italian language but the FAMCARE P-13, which will be  
25 culturally adapted from English using "forward-backward" translation method [11] as part of the  
26 present project; basic psychometric properties will be assessed as well.  
27  
28

29  
30 Use of health care resources during study follow-up will be monthly assessed by a dedicated  
31 research nurse with an ad-hoc developed form reporting: access to a PC service (regular outpatient  
32 PC visits, home care, hospice admission), number of multidisciplinary team visits (oncology and  
33 PC), number of hospitalization and of emergency department admission, with reason and duration.  
34  
35 End of life care quality indicators will be assessed by a dedicated research nurse from the medical  
36 record only for those patients who will die during the follow-up period with an ad-hoc developed  
37 form reporting: chemotherapy administration during the last month of life, place of death and  
38  
39 activation of any PC service (home care or hospice) during the last month.  
40  
41  
42  
43  
44

45 - Insert Table 1 around here -  
46  
47

48  
49 For all data to be collected, Table 1 reports the assessment tools and the timing of various  
50 assessments. Eligible patients will undergo FAMCARE P-13 and EORTC QLQC15-PAL  
51 evaluation at baseline and then monthly for at least 6 months from enrollment or till death (T1, T2,  
52 T3, T4, T5, T6). The choice of interviewing patients every month is suggested by the need to  
53 minimize attrition due to potential patients drop and also to take into account the frequent possible  
54 changes in clinical conditions in a fragile patient population. FAMCARE will be administered to  
55 the main caregiver identified by the patient at T0, T3 and T6 or after patient's death in patients  
56  
57  
58  
59  
60

1  
2  
3 who will die during the follow-up. Patient and caregiver reported outcomes will be collected  
4 through telephone interview. This method was chosen in order to avoid contamination between the  
5 pre- and post- PCRS implementation groups; in fact the PCRS implementation in the posttest  
6 group will be based also on patient reported symptom assessment which will be electronically  
7 collected [12]. HCP reported data will be collected using REDCap electronic data capture tools  
8 hosted at Fondazione IRCCS Istituto Nazionale dei Tumori of Milan  
9  
10  
11  
12  
13  
14  
15  
16  
17  
18  
19  
20  
21  
22  
23  
24  
25  
26  
27  
28  
29  
30  
31  
32  
33  
34  
35  
36  
37  
38  
39  
40  
41  
42  
43  
44  
45  
46  
47  
48  
49  
50  
51  
52  
53  
54  
55  
56  
57  
58  
59  
60

For peer review only

| DATA                               | REPORTED BY | TOOL               | T0<br>Baseline | T1<br>30±3days | T2<br>60±3days | T3<br>90±3days | T4<br>120±3days | T5<br>150±3days | T6<br>180±3days | EOS (*) |
|------------------------------------|-------------|--------------------|----------------|----------------|----------------|----------------|-----------------|-----------------|-----------------|---------|
| Socio-Demographic                  | PATIENT     | Ad hoc form (eCRF) | X              |                |                |                |                 |                 |                 |         |
| Clinical                           | RN/MD       | Ad hoc form (eCRF) | X              | X              | X              | X              | X               | X               | X               |         |
| Patient satisfaction with care     | PATIENT     | FAMCARE P13        | X              | X              | X              | X              | X               | X               | X               |         |
| Quality of life                    | PATIENT     | EORTC-C15 PAL      | X              | X              | X              | X              | X               | X               | X               |         |
| Caregiver satisfaction with care   | CAREGIVER   | FAMCARE            | X              |                |                | X              |                 |                 | X               | (X)     |
| Use of health care resources       | RN          | Ad hoc form (eCRF) |                | X              | X              | X              | X               | X               | X               |         |
| End of life care quality indicator | RN          | Ad hoc form (eCRF) |                |                |                |                |                 |                 |                 | (X)     |

**Table 1: Data collection during study period**

Legenda: RN = research nurse; MD = medical doctor; eCRF = electronic case report forms; EOS = End of study;

\* End of study assessments will be performed only for those patients who die within the study follow-up period.

### Power considerations and statistical analysis

The main endpoint is the variation in patient's satisfaction between baseline and the average of repeated follow-up assessments. t-test for independent samples on this endpoint will be used to compare pre- and post-referral patient cohorts. Power calculations [13] indicate that 150 patients in each group will allow a two tailed t-test for independent samples, a power of 0.9 to detect an effect size of 0.32 with alpha error=0.05. The same analysis scheme will be applied for all continuous repeated measurement outcomes, while binary outcomes (i.e. activation of PC during follow-up or chemotherapy administration during the last month of life) will be analyzed using logistic regression models. Linear and logistic regression models will be used for covariate adjustment estimations.

### Data sharing

De-identified data of participants in this project will be available from the project principal investigator (AC) upon request, provided that the data reuse is in agreement the European General Data Protection Regulation 2016/679 (GDPR)

### Patient and public involvement

No patient nor other member of the public was involved in the development of this research project

## **Discussion**

Early palliative care referral, that is while concurrent anti-neoplastic treatment is still possible and indicated, is considered to improve integration of palliative care in the clinical pathway of patients with advanced disease who cannot achieve cure with the available antineoplastic treatments [2]. This general statement is based on several clinical trials [1] showing advantages of early access to palliative care in improving patient's quality of life, psychological distress, use of health care resources at the end of life and caregivers' distress.

These trials were however based on different clinical models and settings. The model which was more consistently tested as an experimental intervention has been based on the access of patients to specialized palliative care outpatient clinic. In fact, the implementation of this model [14-21] has more consistently shown efficacy if compared with other interventions of care coordination without direct encounters between patients and palliative care professionals [22-25]. This has been also described as an "integrated care model" [26, 27].

Within the integrated model trials, the number and duration of encounters of patients with palliative care professionals varied from 1 every 1.3 weeks to 1 every 6 weeks with a total mean

1  
2  
3  
4 number of visits during the study period ranging from 2.4 to 8.9. Two of the three negative studies  
5 on the integrated model [14, 20] resulted in very limited if any access to specialized palliative care  
6 visits. The third one acknowledged significant in between trial arms contamination [21].  
7  
8

9 Also qualitative type evidences from the same trials support subjective appreciation of  
10 clinical value attributed by patients to integrated palliative care interventions. Patients and  
11 caregivers considered specialized outpatient palliative care capable of providing personalized and  
12  
13  
14  
15  
16  
17  
18  
19  
20  
21  
22  
23  
24  
25  
26  
27  
28  
29  
30  
31  
32  
33  
34  
35  
36  
37  
38  
39  
40  
41  
42  
43  
44  
45  
46  
47  
48  
49  
50  
51  
52  
53  
54  
55  
56  
57  
58  
59  
60

For peer review only

1  
2  
3 prompt symptom management, holistic support to patients and caregivers, guidance in decision  
4 making and preparation for the future [28]. Another study addressed specifically the clinical content  
5 of early outpatient palliative care and showed that interventions based on psychological and cognitive  
6 coping, disease understanding, decision making and care planning were associated with lower  
7 psychological distress and better use of health care resources at the end of life [29]. Finally, the study  
8 by Costantini et al. [30] shows that an early integration of specialized palliative care after the  
9 diagnosis of advanced cancer is feasible and well accepted by patients, relatives and, to a lesser  
10 extent, by oncologists.

11  
12 Overall these data confirm the usefulness of making palliative care outpatient clinic, with  
13 specialized clinical skills and multidimensional assessment, available for patients with advanced  
14 cancer but the selection criteria used in the clinical trials are difficult to translate into clinical  
15 practice. The trials aimed at demonstrating efficacy and detecting outcome changes at the group  
16 level, while statistically accounting for patients heterogeneity. In clinical practice the decision to  
17 refer a patient to palliative care outpatient clinic needs instead to be individualized. Therefore trials'  
18 result cannot clarify how to guarantee timely access at the individual level and to optimize resource  
19 allocation. Trials are also not enough to change clinical practice, without taking into account  
20 practical and cultural barriers that impact on palliative care perception by oncologists and patients  
21 [27, 31].

22  
23 In conclusion the best ways to address earlier palliative care needs identification, timely  
24 access to outpatient palliative care and also to overcome barriers to integration with oncology are  
25 still unresolved issues, and yet late referral is considered to be a significant barrier in many cases  
26 [27, 31-35].

27  
28 The literature discussion about criteria to be used and the domains to be assessed, beyond the  
29 stage of the disease, already considered in all trials, includes symptoms, psychosocial distress,  
30 prognosis, trigger disease related events and critical care planning issues [4, 36-38]. A number of  
31 palliative care need screening and assessment instruments have been developed and sometimes  
32 tested [38-49] but only a few of them were specifically designed to improve appropriate selection of  
33 cancer patients for referral to outpatient specialized palliative care [4, 50]. There are no studies nor  
34 agreed guidelines upon criteria to guide timely referral [47, 51, 52] beyond disease stage [2, 4].

35  
36 Hui et al. [26] published a Delphi study building a consensus on referral criteria among a  
37 number of palliative care expert identifying major and minor criteria and suggesting that referral  
38 should occur anytime one major criterion is met. The same Authors [53], in a retrospective  
39 assessment of the characteristics of patients referred to their palliative care clinic, found that 85%  
40 fulfilled one major criteria and that referral occurred as an average 14 months before death.

1  
2  
3 Interestingly in the study by Singh et al [54] prognostic assessment alone using the Surprise  
4 question had no effect on referral to palliative care including the outpatient setting.

5  
6 The only study looking at implementing an intervention to improve referral to ambulatory  
7 palliative care was planned by a cancer center in Texas as a quality improvement intervention,  
8 including, in a plan-do-study-act cycle, the adoption of a symptom assessment tool and a referral  
9 pathway in oncology clinics. Their initial results show a 10 fold increase of referrals after  
10 implementation, from 0.07% of all oncology clinic encounters to 0.8%. It is unclear how  
11 satisfactory this result can be considered, given the modest number of referrals, in particular  
12 because the relationship with high symptom score is not consistent with such a low referral rate.  
13 The study is still under development [55].

14  
15 The primary aim of our study is therefore to develop and implement a palliative care referral  
16 system which takes into account the suggestions from the literature in combination with consensus  
17 between oncology and palliative care specialists. It is anticipated that in an implementation study  
18 with the aim of intervening on clinical practices evidence based concepts need to be combined with  
19 professional interaction, knowledge of service availability, professional trust and resource allocation  
20 that avoid extra workload burden and alert fatigue [56].

21  
22 Our model of palliative care integration has been available at our center since 2001 [57] and  
23 we recently described its operational characteristics on a consecutive lung cancer patients  
24 population seen at a thoracic oncology clinic. In a two year period, 43% of patients were referred to  
25 palliative care clinics, mainly for symptom control, usually pain and or dyspnoea, and poor  
26 performance status. The mean duration of outpatient palliative care was 128 days [58].

27  
28 The pre and post implementation study design in this protocol will give information on the  
29 feasibility of the PCRS, its impact on user experience of care, patient quality of life and use of  
30 health care resources. Ideally, a cluster randomized trial design would be preferable but at least  
31 6-8 first level units (hospitals) should be involved for the results to be robust, and this is beyond  
32 resources allocated to this research. An individually randomized design, instead, may not be  
33 adequate for the evaluation of a complex intervention with a high contamination risk.  
34 Furthermore the evidence of the potential efficacy of PC referral implementation are still to be  
35 shown. Considering these limitations the aim of the study is not to provide a final estimate of the  
36 effectiveness of PC needs screening but to provide a first estimate of feasibility and impact.  
37 Study completion would also allow the subsequent integration of the PCRS, or of some of its  
38 components [12], at the institutional level in order to steer a change in clinical practice to augment  
39 palliative and oncology integration and improve patient care.

40  
41 The study is part of a nationally funded program (Finalizzata di Rete NET-2018-12367032 - funded

1  
2  
3 by the Italian Ministry of Health and by Regione Lombardia) to address the recognition and  
4 response to palliative care needs in different patients populations and has the opportunity to raise  
5 awareness at the national level about the importance of palliative care integration at the outpatient  
6 level. The national program finalization could strengthen directions for the Ministry of Health to  
7 allocate resources for recognizing the lack of specialized palliative care services at acute hospitals  
8 and promoting their implementation  
9  
10  
11  
12  
13  
14  
15  
16  
17  
18  
19  
20  
21  
22  
23  
24  
25  
26  
27  
28  
29  
30  
31  
32  
33  
34  
35  
36  
37  
38  
39  
40  
41  
42  
43  
44  
45  
46  
47  
48  
49  
50  
51  
52  
53  
54  
55  
56  
57  
58  
59  
60

For peer review only



1  
2  
3 **Ethics** Ethical approval for the study has been granted by the Institutional Review board of the  
4 Fondazione IRCCS Istituto Nazionale Tumori, approval reference INT201/19. The protocol of the  
5 pretest-posttest quasi-experimental design was registered on ClinicalTrials.gov database  
6 (NCT04936568).  
7  
8  
9

### 10 11 **Funding**

12 This study is part of a national program funded by the Italian Ministry of Health and by Regione  
13 Lombardia (NET-2018-12367032)  
14  
15  
16

### 17 18 **Author Contributions**

19  
20  
21 Conceptualization: CB, EZ, AP, PB, MC, SLD, VF, AT, CBe, MB, AR, MN, PS, SP, SA, GT,  
22 FDB, AC

23  
24 Writing—original draft preparation: CB, EZ, AP, PB, MC, SLD, VF, CBe, MB, AR, MN, PS, SP,  
25 SA, GT, FDB, AC

26  
27 Writing—review and editing: CB, EZ, AP, PB, MC, SLD, VF, CBe, MB, AR, MN, PS, SP, SA,  
28 GT, FDB, AC

29  
30 Supervision: CB, EZ, AC

31  
32 All authors have read and agreed to the published version of the manuscript.  
33  
34  
35

### 36 37 **Conflicts of Interest**

38  
39 AC has received consultant honoraria from Mundipharma, Pfizer/Eli Lilly Italia Spa, Angelini,  
40 Shionogi, Molteni and Kyowa Kirin. He has also received research grants from Molteni & C Soc  
41 Esercizio Spa and Ipsen.  
42

43  
44 EZ has received consultant honoraria from Amgen.

45  
46 MN has received travel expenses from Celgene, speaker honorarium from Accademia della  
47 Medicina and consultant honoraria from EMD Serono, Basilea Pharmaceutica, Incyte and MSD  
48 Italia.  
49

50  
51 FDB has received consultant honoraria from Roche, EMD Serono, NMS Nerviano Medical  
52 Science, Sanofi, MSD, Novartis and Incyte. He has received speaker honoraria from BMS,  
53 Healthcare Research & Pharmacoepidemiology, Merck Group, ACCMED, Nadirex, MSD, Pfizer,  
54 Servier, Sanofi, Roche and AMGEN. He has also received research grants from Novartis, Roche,  
55 BMS, Celgene, Incyte, NMS, Merck KGAA, Kymab, Pfizer, Tesaro and MSD.  
56  
57

58  
59 AP, PB, MC, SLD, VF, CBe, MB, PS, SP, SA, AR, GT and CB declare no conflicts of interest.  
60

Figure 1: Project scheme

For peer review only

1  
2  
3  
4  
5  
6  
7  
8  
9  
10  
11  
12  
13  
14  
15  
16  
17  
18  
19  
20  
21  
22  
23  
24  
25  
26  
27  
28  
29  
30  
31  
32  
33  
34  
35  
36  
37  
38  
39  
40  
41  
42  
43  
44  
45  
46  
47  
48  
49  
50  
51  
52  
53  
54  
55  
56  
57  
58  
59  
60

1  
2  
3  
4  
5  
6  
7  
8  
9  
10  
11  
12  
13  
14  
15  
16  
17  
18  
19  
20  
21  
22  
23  
24  
25  
26  
27  
28  
29  
30  
31  
32  
33  
34  
35  
36  
37  
38  
39  
40  
41  
42  
43  
44  
45  
46  
47  
48  
49  
50  
51  
52  
53  
54  
55  
56  
57  
58  
59  
60

## References

1. Haun MW, Estel S, Rucker G et al. Early palliative care for adults with advanced cancer. *Cochrane Database Syst Rev* 2017; 6: CD011129.
2. Ferrell BR, Temel JS, Temin S, Smith TJ. Integration of Palliative Care Into Standard Oncology Care: ASCO Clinical Practice Guideline Update Summary. *J Oncol Pract* 2017; 13: 119-121.
3. Earle CC, Landrum MB, Souza JM et al. Aggressiveness of cancer care near the end of life: is it a quality-of-care issue? *J Clin Oncol* 2008; 26: 3860-3866.
4. Hui D, Meng YC, Bruera S et al. Referral Criteria for Outpatient Palliative Cancer Care: A Systematic Review. *Oncologist* 2016; 21: 895-901.
5. Van de Ven AH, Delbecq AL. The nominal group as a research instrument for exploratory health studies. *Am J Public Health* 1972; 62: 337-342.
6. Cantrill J, Sibbald B, Buetow S. The Delphi and nominal group techniques in health services research. *International Journal of pharmacy practice* 1996; 4: 67-74.
7. Lo C, Burman D, Hales S et al. The FAMCARE-Patient scale: measuring satisfaction with care of outpatients with advanced cancer. *Eur J Cancer* 2009; 45: 3182-3188.
8. Groenvold M, Petersen MA, Aaronson NK et al. The development of the EORTC QLQ-C15-PAL: A shortened questionnaire for cancer patients in palliative care. *Eur J Cancer* 2006; 42: 55-64.
9. Kristjanson LJ. Validity and reliability testing of the FAMCARE Scale: measuring family satisfaction with advanced cancer care. *Soc Sci Med* 1993; 36: 693-701.
10. Chattat R, Ottoboni G, Zeneli A et al. The Italian version of the FAMCARE scale: a validation study. *Support Care Cancer* 2016; 24: 3821-3830.
11. Koller M, Aaronson NK, Blazeby J et al. Translation procedures for standardised quality of life questionnaires: The European Organisation for Research and Treatment of Cancer (EORTC) approach. *Eur J Cancer* 2007; 43: 1810-1820.
12. Brunelli C, Borreani C, Caraceni A et al. PATIENT VOICES, a project for the integration of the systematic assessment of patient reported outcomes and experiences within a comprehensive cancer center: a protocol for a mixed method feasibility study. *Health Qual Life Outcomes* 2020; 18: 252.

- 1  
2  
3 13. Machin D, Campbell M, Fayers P, Pinol A. *Sample Size Tables for Clinical Studies*, 2nd ed.  
4 1997
- 5  
6  
7 14. Groenvold M, Petersen MA, Damkier A et al. Randomised clinical trial of early specialist  
8 palliative care plus standard care versus standard care alone in patients with advanced cancer:  
9 The Danish Palliative Care Trial. *Palliat Med* 2017; 31: 814-824.
- 10  
11  
12 15. Temel JS, Greer JA, Muzikansky A et al. Early palliative care for patients with metastatic non-  
13 small-cell lung cancer. *N Engl J Med* 2010; 363: 733-742.
- 14  
15  
16 16. Zimmermann C, Swami N, Krzyzanowska M et al. Early palliative care for patients with  
17 advanced cancer: a cluster-randomised controlled trial. *Lancet* 2014; 383: 1721-1730.
- 18  
19  
20 17. Maltoni M, Scarpi E, Dall'Agata M et al. Systematic versus on-demand early palliative care: A  
21 randomised clinical trial assessing quality of care and treatment aggressiveness near the end of  
22 life. *Eur J Cancer* 2016; 69: 110-118.
- 23  
24  
25 18. Temel JS, Greer JA, El-Jawahri A et al. Effects of Early Integrated Palliative Care in Patients  
26 With Lung and GI Cancer: A Randomized Clinical Trial. *J Clin Oncol* 2017; 35: 834-841.
- 27  
28  
29 19. Vanbutsele G, Pardon K, Van Belle S et al. Effect of early and systematic integration of  
30 palliative care in patients with advanced cancer: a randomised controlled trial. *Lancet Oncol*  
31 2018; 19: 394-404.
- 32  
33  
34 20. Brims F, Gunatilake S, Lawrie I et al. Early specialist palliative care on quality of life for  
35 malignant pleural mesothelioma: a randomised controlled trial. *Thorax* 2019; 74: 354-361.
- 36  
37  
38 21. Scarpi E, Dall'Agata M, Zagonel V et al. Systematic vs. on-demand early palliative care in  
39 gastric cancer patients: a randomized clinical trial assessing patient and healthcare service  
40 outcomes. *Support Care Cancer* 2019; 27: 2425-2434.
- 41  
42  
43 22. Bakitas M, Lyons KD, Hegel MT et al. Effects of a palliative care intervention on clinical  
44 outcomes in patients with advanced cancer: the Project ENABLE II randomized controlled trial.  
45 *JAMA* 2009; 302: 741-749.
- 46  
47  
48 23. Bakitas MA, Tosteson TD, Li Z et al. Early Versus Delayed Initiation of Concurrent Palliative  
49 Oncology Care: Patient Outcomes in the ENABLE III Randomized Controlled Trial. *J Clin*  
50 *Oncol* 2015; 33: 1438-1445.
- 51  
52  
53 24. Tattersall M, Martin A, Devine R et al. Early contact with palliative care services: a randomised  
54 trial in patients with newly detected incurable metastatic cancer. 2014
- 55  
56  
57  
58  
59  
60

- 1  
2  
3 25. McCorkle R, Jeon S, Ercolano E et al. An Advanced Practice Nurse Coordinated  
4 Multidisciplinary Intervention for Patients with Late-Stage Cancer: A Cluster Randomized  
5 Trial. *J Palliat Med* 2015; 18: 962-969.  
6  
7
- 8  
9 26. Hui D, Mori M, Watanabe SM et al. Referral criteria for outpatient specialty palliative cancer  
10 care: an international consensus. *The Lancet Oncology* 2016; 17: e552-e559.  
11  
12
- 13 27. Kaasa S, Loge JH, Aapro M et al. Integration of oncology and palliative care: a Lancet  
14 Oncology Commission. *Lancet Oncol* 2018; 19: e588-e653.  
15  
16
- 17 28. Hannon B, Swami N, Rodin G et al. Experiences of patients and caregivers with early palliative  
18 care: A qualitative study. *Palliat Med* 2017; 31: 72-81.  
19  
20
- 21 29. Hoerger M, Greer JA, Jackson VA et al. Defining the Elements of Early Palliative Care That  
22 Are Associated With Patient-Reported Outcomes and the Delivery of End-of-Life Care. *J Clin*  
23 *Oncol* 2018; 36: 1096-1102.  
24  
25
- 26 30. Costantini M, Apolone G, Tanzi S et al. Is early integration of palliative care feasible and  
27 acceptable for advanced respiratory and gastrointestinal cancer patients? A phase 2 mixed-  
28 methods study. *Palliat Med* 2018; 32: 46-58.  
29  
30
- 31 31. Wentlandt K, Krzyzanowska MK, Swami N et al. Referral practices of oncologists to  
32 specialized palliative care. *Journal of clinical Oncology* 2012; 30: 4380-4386.  
33  
34
- 35 32. Ullgren H, Kirkpatrick L, Kilpelainen S, Sharp L. Working in silos? - Head & Neck cancer  
36 patients during and after treatment with or without early palliative care referral. *Eur J Oncol*  
37 *Nurs* 2017; 26: 56-62.  
38  
39
- 40 33. Lally K, Chua IS, Lin NU et al. Using Quality Improvement to Increase Access to Palliative  
41 Care. *JCO Oncol Pract* 2021; 17: 107-110.  
42  
43
- 44 34. Mayland CR, Ho QM, Doughty HC et al. The palliative care needs and experiences of people  
45 with advanced head and neck cancer: A scoping review. *Palliat Med* 2021; 35: 27-44.  
46  
47
- 48 35. Salins N, Ghoshal A, Hughes S, Preston N. How views of oncologists and haematologists  
49 impacts palliative care referral: a systematic review. *BMC Palliat Care* 2020; 19: 175-020-  
50 00671-5.  
51  
52
- 53 36. Kayastha N, LeBlanc TW. When to Integrate Palliative Care in the Trajectory of Cancer Care.  
54 *Curr Treat Options Oncol* 2020; 21: 41-020-00743-x.  
55  
56  
57  
58  
59  
60

- 1  
2  
3 37. Silva TH, Peres WAF, Rosa KSDC et al. Advanced Stage of Disease and Systemic  
4 Inflammation as Factors Associated With Referral of Patients With Colorectal Cancer to a  
5 Palliative Care Unit. *Am J Hosp Palliat Care* 2020; 37: 859-865.  
6  
7  
8  
9 38. Ostgathe C, Wendt KN, Heckel M et al. Identifying the need for specialized palliative care in  
10 adult cancer patients - development and validation of a screening procedure based on proxy  
11 assessment by physicians and filter questions. *BMC Cancer* 2019; 19: 646-019-5809-8.  
12  
13  
14 39. Glare PA, Chow K. Validation of a Simple Screening Tool for Identifying Unmet Palliative  
15 Care Needs in Patients With Cancer. *J Oncol Pract* 2015; 11: e81-6.  
16  
17  
18 40. Zalenski R, Courage C, Edelen A et al. Evaluation of screening criteria for palliative care  
19 consultation in the MICU: a multihospital analysis. *BMJ Support Palliat Care* 2014; 4: 254-262.  
20  
21  
22 41. Milnes S, Orford NR, Berkeley L et al. A prospective observational study of prevalence and  
23 outcomes of patients with Gold Standard Framework criteria in a tertiary regional Australian  
24 Hospital. *BMJ Support Palliat Care* 2019; 9: 92-99.  
25  
26  
27 42. Meffert C, Rucker G, Hatami I, Becker G. Identification of hospital patients in need of palliative  
28 care--a predictive score. *BMC Palliat Care* 2016; 15: 21-016-0094-7.  
29  
30  
31 43. Flaherty C, Fox K, McDonah D, Murphy J. Palliative Care Screening: Appraisal of a tool to  
32 identify patients' symptom management and advance care planning needs. *Clin J Oncol Nurs*  
33 2018; 22  
34  
35  
36  
37 44. Lambert S, Bellamy T, Girgis A. Routine assessment of unmet needs in individuals with  
38 advanced cancer and their caregivers: A qualitative study of the palliative care needs assessment  
39 tool (PC-NAT). *J Psychosoc Oncol* 2018; 36: 82-96.  
40  
41  
42 45. Molin Y, Gallay C, Gautier J et al. PALLIA-10, a screening tool to identify patients needing  
43 palliative care referral in comprehensive cancer centers: A prospective multicentric study  
44 (PREPA- 10). *Cancer medicine* 2019; 8: 2950-2961.  
45  
46  
47  
48  
49 46. Marshall TF, Alfano CM, Sleight AG et al. Consensus-building efforts to identify best tools for  
50 screening and assessment for supportive services in oncology. *Disabil Rehabil* 2020; 42: 2178-  
51 2185.  
52  
53  
54  
55 47. Carrasco-Zafra MI, Gómez-García R, Ocaña-Riola R et al. Level of Palliative Care Complexity  
56 in Advanced Cancer Patients: A Multinomial Logistic Analysis. *J Clin Med* 2020; 9: 1960. doi:  
57 10.3390/jcm9061960.  
58  
59  
60

1  
2  
3  
4  
5  
6  
7  
8  
9  
10  
11  
12  
13  
14  
15  
16  
17  
18  
19  
20  
21  
22  
23  
24  
25  
26  
27  
28  
29  
30  
31  
32  
33  
34  
35  
36  
37  
38  
39  
40  
41  
42  
43  
44  
45  
46  
47  
48  
49  
50  
51  
52  
53  
54  
55  
56  
57  
58  
59  
60

48. Le QV, Trinh HL, Mai KNT et al. Screening Patients With Cancer Admitted to Hanoi Medical University Hospital for Palliative Care Needs. *JCO Global Oncology* 2020; 6: 1321-1327.
49. Kwon JH, Baek SK, Kim DY et al. Pilot study for the Psychometric Validation of the Sheffield Profile for Assessment and Referral to Care (SPARC) in Korean Cancer Patients. *Cancer Res Treat* 2021; 53: 25-31.
50. Paiva CE, Paiva BSR, Menezes D et al. Development of a screening tool to improve the referral of patients with breast and gynecological cancer to outpatient palliative care. *Gynecol Oncol* 2020; 158: 153-157.
51. Dudgeon D. The impact of measuring patient-reported outcome measures on quality of and access to palliative care. *J Palliat Med* 2018; 21: S-76-S-80.
52. Kamal AH, Bausewein C, Casarett DJ et al. Standards, Guidelines, and Quality Measures for Successful Specialty Palliative Care Integration Into Oncology: Current Approaches and Future Directions. *J Clin Oncol* 2020; 38: 987-994.
53. Hui D, Anderson L, Tang M et al. Examination of referral criteria for outpatient palliative care among patients with advanced cancer. *Supportive Care in Cancer* 2020; 28: 295-301.
54. Singh S, Rodriguez A, Lee D et al. Usefulness of the surprise question on an inpatient oncology service. *American Journal of Hospice and Palliative Medicine®* 2018; 35: 1421-1425.
55. Rauenzahn SL, Schmidt S, Aduba IO et al. Integrating palliative care services in ambulatory oncology: an application of the Edmonton Symptom Assessment System. *Journal of oncology practice* 2017; 13: e401-e407.
56. Beeler PE, Bates DW, Hug BL. Clinical decision support systems. *Swiss Med Wkly* 2014; 144: w14073.
57. De Conno F, Ripamonti C, Caraceni A, Saita L. Palliative care at the National Cancer Institute of Milan. *Supportive care in cancer* 2001; 9: 141-147.
58. Caraceni A, Lo Dico S, Zecca E et al. Outpatient palliative care and thoracic medical oncology: Referral criteria and clinical care pathways. *Lung Cancer* 2020; 139: 13-17.

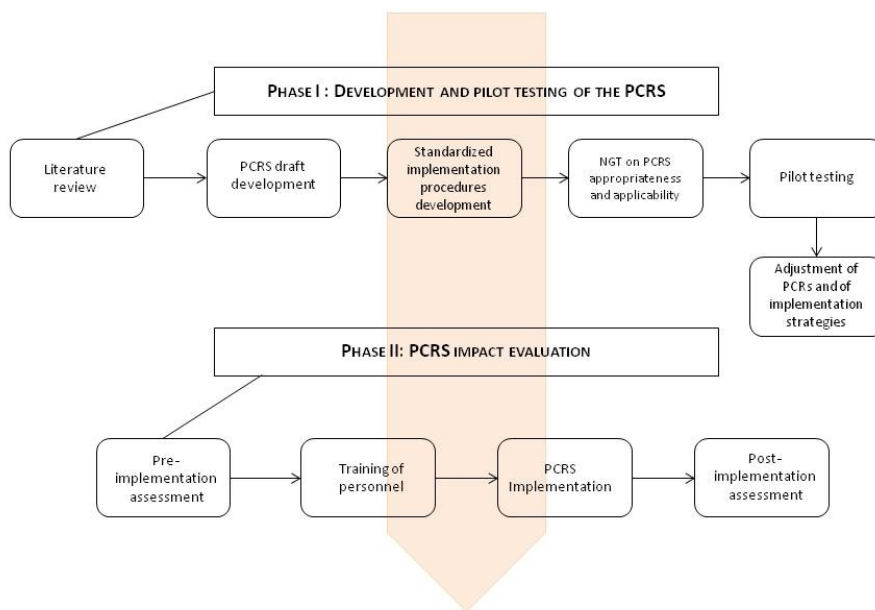

Figure 1: Project scheme

254x190mm (96 x 96 DPI)



# BMJ Open

## Outpatient Palliative Care Referral System (PCRS) for patients with advanced cancer. An impact evaluation protocol.

|                                 |                                                                                                                                                                                                                                                                                                                                                                                                                                                                                                                                                                                                                                                                                                                                                                                                                                                                                                                                                                                                                                                                                                                                                                                                                                                                                                                                                                                                                                                                                                                                           |
|---------------------------------|-------------------------------------------------------------------------------------------------------------------------------------------------------------------------------------------------------------------------------------------------------------------------------------------------------------------------------------------------------------------------------------------------------------------------------------------------------------------------------------------------------------------------------------------------------------------------------------------------------------------------------------------------------------------------------------------------------------------------------------------------------------------------------------------------------------------------------------------------------------------------------------------------------------------------------------------------------------------------------------------------------------------------------------------------------------------------------------------------------------------------------------------------------------------------------------------------------------------------------------------------------------------------------------------------------------------------------------------------------------------------------------------------------------------------------------------------------------------------------------------------------------------------------------------|
| Journal:                        | <i>BMJ Open</i>                                                                                                                                                                                                                                                                                                                                                                                                                                                                                                                                                                                                                                                                                                                                                                                                                                                                                                                                                                                                                                                                                                                                                                                                                                                                                                                                                                                                                                                                                                                           |
| Manuscript ID                   | bmjopen-2021-059410.R1                                                                                                                                                                                                                                                                                                                                                                                                                                                                                                                                                                                                                                                                                                                                                                                                                                                                                                                                                                                                                                                                                                                                                                                                                                                                                                                                                                                                                                                                                                                    |
| Article Type:                   | Protocol                                                                                                                                                                                                                                                                                                                                                                                                                                                                                                                                                                                                                                                                                                                                                                                                                                                                                                                                                                                                                                                                                                                                                                                                                                                                                                                                                                                                                                                                                                                                  |
| Date Submitted by the Author:   | 15-Jun-2022                                                                                                                                                                                                                                                                                                                                                                                                                                                                                                                                                                                                                                                                                                                                                                                                                                                                                                                                                                                                                                                                                                                                                                                                                                                                                                                                                                                                                                                                                                                               |
| Complete List of Authors:       | Brunelli, Cinzia; Fondazione IRCCS Istituto Nazionale Tumori Milan Zecca, Ernesto; Fondazione IRCCS Istituto Nazionale dei Tumori, Pigni, Alessandra; Fondazione IRCCS Istituto Nazionale dei Tumori Bracchi, Paola; Fondazione IRCCS Istituto Nazionale dei Tumori Caputo, Mariangela; Fondazione IRCCS Istituto Nazionale dei Tumori Lo Dico, Silvia; Fondazione IRCCS Istituto Nazionale dei Tumori Fusetti, Viviana; Fondazione IRCCS Istituto Nazionale dei Tumori Tallarita, Antonino; Fondazione IRCCS Istituto Nazionale dei Tumori, Bergamini, Cristiana; Fondazione IRCCS Istituto Nazionale dei Tumori, Medical Oncology Department Brambilla, Marta; Fondazione IRCCS Istituto Nazionale dei Tumori, Medical Oncology Department Raimondi, Alessandra; Fondazione IRCCS Istituto Nazionale dei Tumori, Medical Oncology Department Niger, Monica; Fondazione IRCCS Istituto Nazionale dei Tumori Provenzano, Salvatore; Fondazione IRCCS Istituto Nazionale dei Tumori, Medical Oncology Department Sepe, Pierangela; Fondazione IRCCS Istituto Nazionale dei Tumori, Medical Oncology Department Alfieri, Sara; Fondazione IRCCS Istituto Nazionale dei Tumori Tinè, Gabriele; Fondazione IRCCS Istituto Nazionale dei Tumori De Braud, Filippo; Fondazione IRCCS Istituto Nazionale dei Tumori, Medical Oncology Department; Università degli Studi di Milano Caraceni, A; Fondazione IRCCS Istituto Nazionale dei Tumori, Milan, Italy, Palliative Care, Pain Therapy and Rehabilitation; Università degli Studi di Milano |
| <b>Primary Subject Heading</b>: | Palliative care                                                                                                                                                                                                                                                                                                                                                                                                                                                                                                                                                                                                                                                                                                                                                                                                                                                                                                                                                                                                                                                                                                                                                                                                                                                                                                                                                                                                                                                                                                                           |
| Secondary Subject Heading:      | Oncology, Qualitative research                                                                                                                                                                                                                                                                                                                                                                                                                                                                                                                                                                                                                                                                                                                                                                                                                                                                                                                                                                                                                                                                                                                                                                                                                                                                                                                                                                                                                                                                                                            |
| Keywords:                       | Adult palliative care < PALLIATIVE CARE, Adult oncology < ONCOLOGY, QUALITATIVE RESEARCH                                                                                                                                                                                                                                                                                                                                                                                                                                                                                                                                                                                                                                                                                                                                                                                                                                                                                                                                                                                                                                                                                                                                                                                                                                                                                                                                                                                                                                                  |
|                                 |                                                                                                                                                                                                                                                                                                                                                                                                                                                                                                                                                                                                                                                                                                                                                                                                                                                                                                                                                                                                                                                                                                                                                                                                                                                                                                                                                                                                                                                                                                                                           |

1  
2  
3  
4  
5  
6  
7  
8  
9  
10  
11  
12  
13  
14  
15  
16  
17  
18  
19  
20  
21  
22  
23  
24  
25  
26  
27  
28  
29  
30  
31  
32  
33  
34  
35  
36  
37  
38  
39  
40  
41  
42  
43  
44  
45  
46  
47  
48  
49  
50  
51  
52  
53  
54  
55  
56  
57  
58  
59  
60

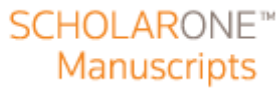

1  
2  
3 **Outpatient Palliative Care Referral System (PCRS) for patients with advanced cancer. An**  
4 **impact evaluation protocol.**  
5  
6  
7

8  
9 Cinzia Brunelli<sup>1\*</sup>, Ernesto Zecca<sup>1\*</sup>, Alessandra Pigni<sup>1</sup>, Paola Bracchi<sup>1</sup>, Mariangela Caputo<sup>1</sup>, Silvia  
10 Lo Dico<sup>1</sup>, Viviana Fusetti<sup>1</sup>, Antonino Tallarita<sup>1</sup>, Cristiana Bergamini<sup>2</sup>, Marta Brambilla<sup>2</sup>,  
11 Alessandra Raimondi<sup>2</sup>, Monica Niger<sup>2</sup>, Salvatore Provenzano<sup>2</sup>, Pierangela Sepe<sup>2</sup>, Sara Alfieri<sup>3</sup>,  
12 Gabriele Tinè<sup>4</sup>, Filippo De Braud<sup>2,5</sup> and Augusto Caraceni<sup>1,5</sup>  
13  
14  
15

16 \* Equally first Authors  
17  
18

19 <sup>1</sup> Palliative care, Pain Therapy and Rehabilitation Unit, Fondazione IRCCS Istituto Nazionale dei Tumori,  
20 Milan, Italy.  
21

22 <sup>2</sup> Medical Oncology Department, Fondazione IRCCS Istituto Nazionale dei Tumori, Milan, Italy.  
23

24 <sup>3</sup> Clinical Psychology Unit, Fondazione IRCCS Istituto Nazionale dei Tumori, Milan, Italy.  
25

26 <sup>4</sup> Unit of Clinical Epidemiology and Trial Organisation, Fondazione IRCCS Istituto Nazionale dei Tumori,  
27 Milan, Italy.  
28

29 <sup>5</sup> Università degli Studi di Milano , Milan, Italy.  
30

31 **Corresponding author**

32 Ernesto Zecca, MD

33 Palliative care, Pain Therapy and Rehabilitation Unit,

34 Fondazione IRCCS Istituto Nazionale dei Tumori

35 via Venezian, 1- 20133 Milano, Italy

36 ernesto.zecca@istitutotumori.mi.it  
37  
38  
39  
40

41 **Key words:**

42 early outpatient palliative care, advanced cancer, referral, oncology palliative care integration  
43  
44  
45  
46  
47  
48  
49  
50  
51  
52  
53  
54  
55  
56  
57  
58  
59  
60

## Abstract

**Objectives.** Early palliative care (PC) in the clinical pathway of advanced cancer patients improves symptom control, quality of life and positively impact on overall quality of care. Currently, standardized criteria for appropriate referral to early PC in oncology care are lacking. The project aims to develop a set of standardized referral criteria and procedures to implement appropriate early PC for advanced cancer patients (the Palliative Care Referral System, PCRS) and test its impact on user perception of quality of care received, on patient quality of life, and the use of healthcare resources.

**Setting.** Selected oncology clinics and PC outpatient clinics.

**Method.** A scoping literature review and an expert consultation through a nominal group technique will be used to revise existing referral tools and to develop a new one, the PCRS. Twenty-five patients will be enrolled in a pilot study to assess the feasibility of implementing PCRS; ten interviews with patients and health care professionals will be conducted to evaluate applicability.

A pretest-posttest quasi-experimental study involving 150 patients before and 150 patients after implementation will be carried out.

**Intervention.** Implementation of PCRS for the identification of advanced cancer patients in need of palliative care in routine outpatient cancer care.

**Outcome.** Patient satisfaction with care received, quality life, and use of resources; caregiver satisfaction with care to explore the impact of the intervention.

**Conclusion.** Our hypothesis is that using tools for standardized PC referral criteria can extend the benefits of improved care quality and efficient resource use to a broader population of frail patients. The timely identification of patients who can benefit from PC will likely promote “end-of-life” care approaches, avoiding medical overtreatment, futile diagnostic examinations, and access to acute care facilities.

**Trial Registration.** The pretest-posttest trial was registered on ClinicalTrials.gov database (NCT04936568).

#### Strengths and limitations of this study

- The development and implementation of a palliative care referral system (PCRS) that takes into account published evidence and consensus among oncology and palliative care professionals constitute a strength of this project.
- The pre and post implementation study design will provide evidence on the feasibility of the PCRS and its impact on user experience of care, patient quality of life and use of health care resources.
- Ideally, a randomized trial would provide higher value evidence; however an individually randomized design may not be adequate due to the high risk of contamination typical of complex intervention studies. On the other hand a cluster randomized trial would limit contamination but should involve at least 6-8 first level units or hospitals for the results to be robust, and this was beyond the resources allocated to this preliminary phase research.

## Introduction

Palliative care (PC) is aimed at reducing or preventing suffering and improving quality of life for patients affected by incurable advanced illnesses and their caregivers. Traditionally PC has been limited to the terminal phase of illness with an unclear impact on overall disease trajectory. In recent years the term “early palliative care” has been coined to describe an anticipated approach to PC in the care pathway of advanced diseases. In the case of advanced cancer, this means that PC can already start along with treatments such as chemotherapy, radiotherapy and other disease modifying interventions, planned for the management of advanced disease [1].

According to the latest American Society of Clinical Oncology consensus on integration of PC into standard oncology care, PC is defined early when administered within eight weeks from the diagnosis of advanced cancer, a definition that is too generic to be operationally implemented [2]. As shown in systematic literature reviews [1] randomized controlled trials demonstrate that the introduction of outpatient PC from the time of diagnosis of advanced cancer is associated with benefit on several clinical and care dimensions [1].

On the other hand, early PC is associated with less aggressive cancer treatment at the end of life, such as reduced use of chemotherapy in the last weeks of life and reduced access to intensive care units and emergency rooms [3].

Despite the evidence on the benefit of early PC, there is no standard definition of how oncologists should decide to refer patients to the PC specialist once advanced or metastatic disease is diagnosed. To optimize the potential impact of EPC on the overall care pathway, it would be important to combine the capacity of PC teams to participate timely in the shared decision-making process (including patient, family and attending oncologist), and, at the same time, the capacity of the multidisciplinary oncology team to integrate the advice of the PC specialist [4].

Without a suitable patient selection process for palliative care referral, outpatient palliative care services may be overwhelmed by excessive and perhaps inappropriate requests or, alternatively, resources could be underutilised if referrals do not occur. At present the volume and timing of referral to outpatient PC for cancer patients vary widely among services. This can be in part explained by the lack of standardized referral criteria for outpatient PC, coupled with variable oncologists’ attitudes and beliefs about PC and differences in models and availability of PC services [4].

It would be desirable to provide a personalized care plan for each patient, taking into account different diseases trajectories and identifying the timing and the ways in which patients can be referred to PC. Criteria establishing the right moment for the right patient for referral including are

1  
2  
3 needed to personalize care pathways and optimize resource allocations to improve care outcomes.

4  
5 This project has a twofold aim:

- 6  
7 1. To develop and study the feasibility of a standardized palliative care referral system (PCRS)  
8 for outpatient PC in advanced cancer patients.
- 9  
10 2. To evaluate the impact of routine application of the PCRS in a population of patients cared  
11 for in a comprehensive cancer centre.

## 12 13 14 15 **Methods**

16  
17 The project has been organized into two main sequential phases and second level steps as  
18 reported in Figure 1. The study intervention will be applied within several selected oncology clinics  
19 covering both frequent and rare cancers (lung, gastrointestinal, genitourinary, head & neck and  
20 sarcoma) and the PC outpatient clinic. In our PC clinic patients regularly encounter PC specialists  
21 and are assessed by nurses for symptoms and psychosocial dimension using validated self reported  
22 questionnaires [5]. Psychological consult is also available as needed. For each oncology clinic one  
23 oncologist will participate directly in the study procedures.

24  
25  
26  
27  
28  
29  
30  
31 - Insert Figure 1 around here -  
32  
33

### 34 **Phase I: Development and pilot testing of the PCRS**

35  
36 Criteria used for PC referral in advanced cancer patients will be identified through a scoping  
37 review of the literature on existing PC needs screening tools and methods (Table 1). The choice of  
38 the criteria that will constitute the PCRS will be based on their clinical relevance and prognostic  
39 value; existing criteria will be modified if needed. A first draft of the PCRS tool will be developed  
40 and its appropriateness and feasibility in routine clinical practice will be evaluated using Nominal  
41 group technique (NGT) [6] carried out with different health care providers (oncologists, PC  
42 specialists, nurses and psychologist) with extensive experience in oncology and palliative care.  
43 NGT is a qualitative research methodology aimed at verifying the possible convergence of a group  
44 of experts on an idea, judgment or proposal. NGT consists of six stages [7]: 1. Presentation of the  
45 nominal question; 2. Individual generation of ideas or voting; 3. Round-robin feedback from  
46 participants to record each idea/voting; 4. Group discussion of each idea/voting in turn for  
47 clarification and evaluation; 5. Individual voting on priority ideas with the group decision derived  
48 through rank-ordering or rating; 6. Sharing of results, further discussion and re-voting. Based on the  
49 NGT results, the PCRS will be adjusted/modified as needed and standard implementation  
50  
51  
52  
53  
54  
55  
56  
57  
58  
59  
60

1  
2  
3 procedures will be developed.

4  
5 Then a pilot cross-sectional feasibility study on the application of the PCRS will be carried  
6 out on 5 consecutive patients in each of the 5 outpatient clinics that will be involved in the Phase II  
7 of the project. Feasibility assessment will include: time needed to screen the patient, number of  
8 patients for which the screening was complete, number of missing data for each criterion.  
9  
10 Acceptability of PCRS by patients and by health care professionals, as well as integration of the  
11 assessment procedure with routine clinical practice will also be evaluated through debriefing  
12 interviews with 5 patients and 5 health care professionals. A final revision of the PCRS and of its  
13 implementation procedure by the study group will follow the pilot testing.  
14  
15  
16  
17  
18  
19

## 20 **Phase II: PCRS implementation and impact evaluation.**

21  
22 The potential impact of the PCRS will be explored using a quasi-experimental study design  
23 measuring study endpoints before and after PCRS implementation (Figure 1).  
24

### 25 Study design and patient population

26  
27 A longitudinal pretest-posttest design will be carried out. Two different cohorts of advanced  
28 cancer patients will be enrolled before (pretest) and after (posttest) the introduction of the PCRS in  
29 outpatient clinics. Patient inclusion criteria are: age >18 years; diagnosis of inoperable locally  
30 advanced and/or metastatic cancer. Exclusion criteria: eligibility to anticancer treatment with  
31 advanced and/or metastatic cancer. Exclusion criteria: eligibility to anticancer treatment with  
32 curative intent; patients already enrolled in a PC program; cognitive impairment.  
33  
34  
35

### 36 PCRS implementation

37  
38 For implementing the PCRS, patient clinical assessment will be performed initially by a  
39 nurse, collecting self reported questionnaires and partially completing the PCRS. This evaluation  
40 will be entered in the electronic medical records and then integrated and validated by the oncologist  
41 during the visit. The oncologist will finally decide to refer or not the patient to PC using the PCRS  
42 predefined criteria and his or her clinical judgment.  
43  
44  
45

### 46 Study Outcomes and assessment methods

47  
48 The following outcomes will be evaluated: patient's satisfaction with care (main outcome), patient's  
49 quality of life, caregiver's satisfaction with care, use of health care resources, and end of life care  
50 quality indicators.  
51  
52

53  
54 The FAMCARE-P13 will be used to assess patient satisfaction with care in the present  
55 study. It is a 13 item self-report questionnaire, developed to be used with advanced cancer patients  
56 [8]. Its items are rated from 1 (very dissatisfied) to 5 (very satisfied) producing a single satisfaction  
57 score ranging from 13 to 65.  
58  
59  
60



1  
2  
3 The EORTC Quality of Life Questionnaire Core 15 for Palliative Care (QLQ-C15-PAL) [9]  
4 will be used to evaluate patients' quality of life. QLQ-C15-PAL is an abbreviated 15-item version  
5 of EORTC-QLQC30 specifically developed for use in a palliative care setting. It includes two  
6 multi-item functional scales (physical and emotional functioning), two multi-item symptom scales  
7 (fatigue and pain), five single-item symptom scales (nausea/vomiting, dyspnoea, insomnia, appetite  
8 loss and constipation) and a question regarding overall QoL (global health status). Items are rated  
9 on a Likert scale from 1 (not at all) to 4 (very much) with the exception of global health status,  
10 which is rated from 1 (very poor) to 7 (excellent).  
11  
12

13  
14  
15  
16  
17 Family satisfaction with care will be assessed with the FAMCARE scale [10, 11]. It is a self-  
18 assessment satisfaction composed of 20 items rated according to a 5-point Likert scale from 1 (very  
19 satisfied) to 5 (very dissatisfied). The items are grouped into four subscales: Physical patient care,  
20 Information giving, Availability of care and Psychosocial care subscale.  
21  
22 The FAMCARE Scale can be administered to family members while a patient is receiving palliative  
23 care or at some point after a patient's death.  
24  
25  
26

27  
28 All tools applied are validated in Italian language but the FAMCARE P-13, which will be  
29 culturally adapted from English using "forward-backward" translation method [12] as part of the  
30 present project; basic psychometric properties will be assessed as well.  
31  
32

33 Use of health care resources during study follow-up will be monthly assessed by a dedicated  
34 research nurse with an ad-hoc developed form reporting: access to a PC service (regular outpatient  
35 PC visits, home care, hospice admission), number of multidisciplinary team visits (oncology and  
36 PC), number of hospitalization and of emergency department admission, with reason and duration.  
37  
38 End of life care quality indicators will be assessed by a dedicated research nurse from the medical  
39 record only for those patients who will die during the follow-up period with an ad-hoc developed  
40 form reporting: chemotherapy administration during the last month of life, place of death and  
41 activation of any PC service (home care or hospice) during the last month.  
42  
43  
44  
45  
46  
47

48 - Insert Table 1 around here -  
49

50  
51 For all data to be collected, Table 1 reports the assessment tools and the timing of various  
52 assessments. Eligible patients will undergo FAMCARE P-13 and EORTC QLQC15-PAL  
53 evaluation at baseline and then monthly for at least 6 months from enrollment or till death (T1, T2,  
54 T3, T4, T5, T6). The choice of interviewing patients every month is suggested by the need to  
55 minimize attrition due to potential patients drop out and also to take into account the frequent  
56  
57  
58  
59  
60

1  
2  
3 possible changes in clinical conditions in a fragile patient population. FAMCARE will be  
4 administered to the main caregiver identified by the patient at T0, T3 and T6 or after patient's  
5 death in patients who will die during the follow-up. Patient and caregiver reported outcomes will  
6 be collected through telephone interview. This method was chosen in order to avoid contamination  
7 between the pre- and post- PCRS implementation groups; in fact the PCRS implementation in the  
8 posttest group will be based also on patient reported symptom assessment which will be  
9 electronically collected [13]. Health care professional reported data will be collected using  
10 REDCap electronic data capture tools hosted at Fondazione IRCCS Istituto Nazionale dei Tumori  
11 of Milan  
12  
13  
14  
15  
16  
17  
18  
19  
20  
21  
22  
23  
24  
25  
26  
27  
28  
29  
30  
31  
32  
33  
34  
35  
36  
37  
38  
39  
40  
41  
42  
43  
44  
45  
46  
47  
48  
49  
50  
51  
52  
53  
54  
55  
56  
57  
58  
59  
60

For peer review only

| DATA                               | REPORTED BY | TOOL               | T0<br>Baseline | T1<br>30±3days | T2<br>60±3days | T3<br>90±3days | T4<br>120±3days | T5<br>150±3days | T6<br>180±3days | EOS (*) |
|------------------------------------|-------------|--------------------|----------------|----------------|----------------|----------------|-----------------|-----------------|-----------------|---------|
| Socio-Demographic                  | PATIENT     | Ad hoc form (eCRF) | X              |                |                |                |                 |                 |                 |         |
| Clinical                           | RN/MD       | Ad hoc form (eCRF) | X              | X              | X              | X              | X               | X               | X               |         |
| Patient satisfaction with care     | PATIENT     | FAMCARE P13        | X              | X              | X              | X              | X               | X               | X               |         |
| Quality of life                    | PATIENT     | EORTC-C15 PAL      | X              | X              | X              | X              | X               | X               | X               |         |
| Caregiver satisfaction with care   | CAREGIVER   | FAMCARE            | X              |                |                | X              |                 |                 | X               | (X)     |
| Use of health care resources       | RN          | Ad hoc form (eCRF) |                | X              | X              | X              | X               | X               | X               |         |
| End of life care quality indicator | RN          | Ad hoc form (eCRF) |                |                |                |                |                 |                 |                 | (X)     |

**Table 1: Data collection during study period**

Legenda: RN = research nurse; MD = medical doctor; eCRF = electronic case report forms; EOS = End of study;

\* End of study assessments will be performed only for those patients who die within the study follow-up period.

### Power considerations and statistical analysis

The main endpoint is the variation in patient's satisfaction between baseline and the average of repeated follow-up assessments. t-test for independent samples on this endpoint will be used to compare pre- and post- referral patient cohorts. Power calculations [14] indicate that 150 patients in each group will allow a two tailed t-test for independent samples, a power of 0.9 to detect an effect size of 0.375 with alpha error=0.05. In case of a 15% attrition rate the study power reduces at 85%, all else unchanged. The same analysis scheme will be applied for all continuous repeated measurement outcomes, while binary outcomes (i.e. activation of PC during follow-up or chemotherapy administration during the last month of life) will be analyzed using logistic regression models. Linear and logistic regression models will be used for covariate adjustment estimations.

### Data sharing

De-identified data of participants in this project will be available from the project principal investigator (AC) upon request, provided that the data reuse is in agreement the European General Data Protection Regulation 2016/679 (GDPR).

### Patient and public involvement

No patient nor other member of the public was involved in the development of this research project.

## **Discussion**

Early palliative care referral, while concurrent anti-neoplastic treatment is still possible and indicated, is considered to improve integration of palliative care in the clinical pathway of patients with advanced disease who cannot achieve cure with the available antineoplastic treatments [2]. This general statement is based on several clinical trials [1] showing advantages of early access to palliative care in improving patient's quality of life, psychological distress, use of health care resources at the end of life and caregivers' distress.

### Different early palliative care models

These trials were however based on different clinical models and settings. The model which was more consistently tested as an experimental intervention has been based on the access of patients to specialized palliative care outpatient clinic. In fact, the implementation of this model [15-22] has more consistently shown efficacy if compared with other interventions of care coordination without direct encounters between patients and palliative care professionals [23-26]. This has been also described as an "integrated care model" [27, 28].

Within the integrated model trials, the number and duration of encounters of patients with

1  
2  
3 palliative care professionals varied from 1 every 1.3 weeks to 1 every 6 weeks with a total mean  
4 number of visits during the study period ranging from 2.4 to 8.9. Two of the three negative studies  
5 on the integrated model [15, 21] resulted in very limited if any access to specialized palliative care  
6 visits. The third one acknowledged significant in between trial arms contamination [22].  
7  
8

9  
10 Also qualitative type evidences from the same trials support subjective appreciation of  
11 clinical value attributed by patients to integrated palliative care interventions. Patients and  
12 caregivers considered specialized outpatient palliative care capable of providing personalized and  
13 prompt symptom management, holistic support to patients and caregivers, guidance in decision  
14 making and preparation for the future [29]. Another study addressed specifically the clinical content  
15 of early outpatient palliative care and showed that interventions based on psychological and cognitive  
16 coping, disease understanding, decision making and care planning were associated with lower  
17 psychological distress and better use of health care resources at the end of life [30]. Finally, the study  
18 by Costantini et al. [31] shows that an early integration of specialized palliative care after the  
19 diagnosis of advanced cancer is feasible and well accepted by patients, relatives and, to a lesser  
20 extent, by oncologists.  
21  
22

### 23 Palliative care needs selection criteria

24  
25 Overall these data confirm the usefulness of the palliative care outpatient clinic approach,  
26 with specialized clinical skills and multidimensional assessment, for patients with advanced cancer  
27 but the selection criteria used in the clinical trials are difficult to translate into clinical practice. The  
28 trials aimed at demonstrating efficacy and detecting outcome changes at the group level, while  
29 statistically accounting for patients heterogeneity. In clinical practice the decision to refer a patient  
30 to palliative care outpatient clinic needs instead to be individualized. Therefore trials' result cannot  
31 clarify how to guarantee timely access at the individual level and to optimize resource allocation.  
32  
33 Trials are also not enough to change clinical practice, without taking into account practical and  
34 cultural barriers that impact on palliative care perception by oncologists and patients [28, 32].  
35  
36

37  
38 In summary the best ways to address earlier palliative care needs identification, timely  
39 access to outpatient palliative care and also to overcome barriers to integration with oncology are  
40 still unresolved issues, and yet late referral is considered to be a significant barrier in many cases  
41 [28, 32-36].  
42  
43

44  
45 The literature discussion about criteria to be used and the domains to be assessed, beyond the  
46 stage of the disease, already considered in all trials, includes symptoms, psychosocial distress,  
47 prognosis, trigger disease related events and critical care planning issues [4, 37-39]. A number of  
48 palliative care need screening and assessment instruments have been developed and sometimes  
49 tested [39-50] but only a few of them were specifically designed to improve appropriate selection of  
50  
51  
52  
53  
54  
55  
56  
57  
58  
59  
60

1  
2  
3 cancer patients for referral to outpatient specialized palliative care [4, 51] . There are no studies nor  
4 agreed guidelines upon criteria to guide timely referral [48, 52, 53] beyond disease stage [2, 4].

5  
6 Hui et al. [27] published a Delphi study building a consensus on referral criteria among a  
7 number of palliative care expert identifying major and minor criteria and suggesting that referral  
8 should occur anytime one major criterion is met. The same Authors [54], in a retrospective  
9 assessment of the characteristics of patients referred to their palliative care clinic, found that 85%  
10 fulfilled one major criteria and that referral occurred as an average 14 months before death.  
11  
12

13  
14  
15 Interestingly in the study by Singh et al [55] prognostic assessment alone using the  
16 Surprise question had no effect on referral to palliative care including the outpatient setting.  
17

18  
19 The only study looking at implementing an intervention to improve referral to ambulatory  
20 palliative care was planned by a cancer center in Texas as a quality improvement intervention,  
21 including, in a plan-do-study-act cycle, the adoption of a symptom assessment tool and a referral  
22 pathway in oncology clinics. Their initial results show a 10 fold increase of referrals after  
23 implementation, from 0.07% of all oncology clinic encounters to 0.8%. It is unclear how  
24 satisfactory this result can be considered, given the modest number of referrals, in particular  
25 because the relationship with high symptom score is not consistent with such a low referral rate.  
26  
27 The study is still under development [56].  
28  
29  
30  
31

### 32 The PCRS project

33  
34 The primary aim of our study is therefore to develop and implement a palliative care referral  
35 system which takes into account the suggestions from the literature in combination with consensus  
36 between oncology and palliative care specialists. It is anticipated that in an implementation study  
37 with the aim of intervening on clinical practices, evidence based concepts need to be combined with  
38 professional interaction, knowledge of service availability, professional trust and resource allocation  
39 that avoid extra workload burden and alert fatigue [57].  
40  
41  
42  
43

44  
45 Palliative care integration has been available at our center since 2001 [58] and we recently  
46 described its operational characteristics on a consecutive lung cancer patients population seen at a  
47 thoracic oncology clinic. In a two year period, 43% of patients were referred to palliative care  
48 clinics, mainly for symptom control, usually pain and or dyspnoea, and poor performance status.  
49  
50 The mean duration of outpatient palliative care was 128 days [59].  
51  
52

53  
54 The pre and post implementation study design in this protocol will give information on the  
55 feasibility of the PCRS, its impact on user experience of care, patient quality of life and use of  
56 health care resources. Ideally, a cluster randomized trial design would be preferable but at least  
57 6-8 first level units (hospitals) should be involved for the results to be robust, and this is beyond  
58 resources allocated to this research. An individually randomized design, instead, may not be  
59  
60

adequate for the evaluation of a complex intervention with a high contamination risk. Furthermore the evidence of the potential efficacy of PC referral implementation are still to be shown. Considering these limitations the aim of the study is not to provide a final estimate of the effectiveness of PC needs screening but to provide a first estimate of feasibility and impact. Study completion would also allow the subsequent integration of the PCRS, or of some of its components [13], at the institutional level in order to steer a change in clinical practice to augment palliative and oncology integration and improve patient care.

The study is part of a nationally funded program (Finalizzata di Rete NET-2018-12367032 - funded by the Italian Ministry of Health and by Regione Lombardia) to address the recognition and response to palliative care needs in different patients populations and has the opportunity to raise awareness at the national level about the importance of palliative care integration at the outpatient level. The national program finalization could strengthen directions for the Ministry of Health to allocate resources for recognizing the lack of specialized palliative care services at acute hospitals and promoting their implementation.

**Ethics** Ethical approval for the study has been granted by the Institutional Review board of the Fondazione IRCCS Istituto Nazionale Tumori, approval reference INT201/19. The protocol of the pretest-posttest quasi-experimental design was registered on ClinicalTrials.gov database (NCT04936568).

### **Funding**

This study is part of a national program funded by the Italian Ministry of Health and by Regione Lombardia (NET-2018-12367032).

### **Author Contributions**

Conceptualization: CB, EZ, AP, PB, MC, SLD, VF, AT, CBe, MB, AR, MN, PS, SP, SA, GT, FDB, AC

Writing—original draft preparation: CB, EZ, AP, PB, MC, SLD, VF, CBe, MB, AR, MN, PS, SP, SA, GT, FDB, AC

Writing—review and editing: CB, EZ, AP, PB, MC, SLD, VF, CBe, MB, AR, MN, PS, SP, SA, GT, FDB, AC

Supervision: CB, EZ, AC

All authors have read and agreed to the published version of the manuscript.



1  
2  
3  
4  
5  
6  
7  
8  
9  
10  
11  
12  
13  
14  
15  
16  
17  
18  
19  
20  
21  
22  
23  
24  
25  
26  
27  
28  
29  
30  
31  
32  
33  
34  
35  
36  
37  
38  
39  
40  
41  
42  
43  
44  
45  
46  
47  
48  
49  
50  
51  
52  
53  
54  
55  
56  
57  
58  
59  
60

## Conflicts of Interest

AC has received consultant honoraria from Mundipharma, Pfizer/Eli Lilly Italia Spa, Angelini, Shionogi, Molteni and Kyowa Kirin. He has also received research grants from Molteni & C Soc Esercizio Spa and Ipsen.

EZ has received consultant honoraria from Amgen.

MN has received travel expenses from Celgene, speaker honorarium from Accademia della Medicina and consultant honoraria from EMD Serono, Basilea Pharmaceutica, Incyte and MSD Italia.

FDB has received consultant honoraria from Roche, EMD Serono, NMS Nerviano Medical Science, Sanofi, MSD, Novartis and Incyte. He has received speaker honoraria from BMS, Healthcare Research & Pharmacoepidemiology, Merck Group, ACCMED, Nadirex, MSD, Pfizer, Servier, Sanofi, Roche and AMGEN. He has also received research grants from Novartis, Roche, BMS, Celgene, Incyte, NMS, Merck KGAA, Kymab, Pfizer, Tesaro and MSD.

AP, PB, MC, SLD, VF, CBe, MB, PS, SP, SA, AR, GT and CB declare no conflicts of interest.

Figure 1: Project scheme

## References

1. Haun MW, Estel S, Rucker G et al. Early palliative care for adults with advanced cancer. *Cochrane Database Syst Rev* 2017; 6: CD011129.
2. Ferrell BR, Temel JS, Temin S, Smith TJ. Integration of Palliative Care Into Standard Oncology Care: ASCO Clinical Practice Guideline Update Summary. *J Oncol Pract* 2017; 13: 119-121.
3. Earle CC, Landrum MB, Souza JM et al. Aggressiveness of cancer care near the end of life: is it a quality-of-care issue? *J Clin Oncol* 2008; 26: 3860-3866.
4. Hui D, Meng YC, Bruera S et al. Referral Criteria for Outpatient Palliative Cancer Care: A Systematic Review. *Oncologist* 2016; 21: 895-901.



- 1  
2  
3 5. US Department of Health and Human Services FDA Center for Drug Evaluation and Research, US  
4  
5 Department of Health and Human Services FDA Center for Biologics Evaluation and Research.  
6  
7 US Department of Health and Human Services FDA Center for Devices and Radiological Health.  
8  
9 Guidance for industry: patient-reported outcome measures: use in medical product development to  
10  
11 support labeling claims: draft guidance. *Health Qual Life Outcomes* 2006; 4: 79.  
12  
13
- 14  
15 6. Van de Ven AH, Delbecq AL. The nominal group as a research instrument for exploratory health  
16  
17 studies. *Am J Public Health* 1972; 62: 337-342.  
18  
19
- 20  
21 7. Cantrill J, Sibbald B, Buetow S. The Delphi and nominal group techniques in health services  
22  
23 research. *International Journal of pharmacy practice* 1996; 4: 67-74.  
24  
25
- 26  
27 8. Lo C, Burman D, Hales S et al. The FAMCARE-Patient scale: measuring satisfaction with care of  
28  
29 outpatients with advanced cancer. *Eur J Cancer* 2009; 45: 3182-3188.  
30  
31
- 32  
33 9. Groenvold M, Petersen MA, Aaronson NK et al. The development of the EORTC QLQ-C15-PAL:  
34  
35 A shortened questionnaire for cancer patients in palliative care. *Eur J Cancer* 2006; 42: 55-64.  
36  
37
- 38  
39 10. Kristjanson LJ. Validity and reliability testing of the FAMCARE Scale: measuring family  
40  
41 satisfaction with advanced cancer care. *Soc Sci Med* 1993; 36: 693-701.  
42  
43
- 44  
45 11. Chattat R, Ottoboni G, Zeneli A et al. The Italian version of the FAMCARE scale: a validation  
46  
47 study. *Support Care Cancer* 2016; 24: 3821-3830.  
48  
49
- 50  
51 12. Koller M, Aaronson NK, Blazeby J et al. Translation procedures for standardised quality of life  
52  
53 questionnaires: The European Organisation for Research and Treatment of Cancer (EORTC)  
54  
55 approach. *Eur J Cancer* 2007; 43: 1810-1820.  
56  
57
- 58  
59 13. Brunelli C, Borreani C, Caraceni A et al. PATIENT VOICES, a project for the integration of the  
60  
61 systematic assessment of patient reported outcomes and experiences within a comprehensive

- 1  
2  
3 cancer center: a protocol for a mixed method feasibility study. *Health Qual Life Outcomes* 2020;  
4  
5 18: 252.  
6  
7  
8  
9 14. Machin D, Campbell M, Fayers P, Pinol A. *Sample Size Tables for Clinical Studies*, 2nd ed. 1997  
10  
11  
12 15. Groenvold M, Petersen MA, Damkier A et al. Randomised clinical trial of early specialist  
13  
14 palliative care plus standard care versus standard care alone in patients with advanced cancer: The  
15  
16 Danish Palliative Care Trial. *Palliat Med* 2017; 31: 814-824.  
17  
18  
19  
20 16. Temel JS, Greer JA, Muzikansky A et al. Early palliative care for patients with metastatic non-  
21  
22 small-cell lung cancer. *N Engl J Med* 2010; 363: 733-742.  
23  
24  
25  
26 17. Zimmermann C, Swami N, Krzyzanowska M et al. Early palliative care for patients with advanced  
27  
28 cancer: a cluster-randomised controlled trial. *Lancet* 2014; 383: 1721-1730.  
29  
30  
31  
32 18. Maltoni M, Scarpi E, Dall'Agata M et al. Systematic versus on-demand early palliative care: A  
33  
34 randomised clinical trial assessing quality of care and treatment aggressiveness near the end of  
35  
36 life. *Eur J Cancer* 2016; 69: 110-118.  
37  
38  
39  
40 19. Temel JS, Greer JA, El-Jawahri A et al. Effects of Early Integrated Palliative Care in Patients With  
41  
42 Lung and GI Cancer: A Randomized Clinical Trial. *J Clin Oncol* 2017; 35: 834-841.  
43  
44  
45  
46 20. Vanbutsele G, Pardon K, Van Belle S et al. Effect of early and systematic integration of palliative  
47  
48 care in patients with advanced cancer: a randomised controlled trial. *Lancet Oncol* 2018; 19: 394-  
49  
50 404.  
51  
52  
53  
54 21. Brims F, Gunatilake S, Lawrie I et al. Early specialist palliative care on quality of life for  
55  
56 malignant pleural mesothelioma: a randomised controlled trial. *Thorax* 2019; 74: 354-361.  
57  
58  
59  
60

- 1  
2  
3 22. Scarpi E, Dall'Agata M, Zagonel V et al. Systematic vs. on-demand early palliative care in gastric  
4 cancer patients: a randomized clinical trial assessing patient and healthcare service outcomes.  
5 Support Care Cancer 2019; 27: 2425-2434.  
6  
7  
8  
9  
10  
11 23. Bakitas M, Lyons KD, Hegel MT et al. Effects of a palliative care intervention on clinical  
12 outcomes in patients with advanced cancer: the Project ENABLE II randomized controlled trial.  
13 JAMA 2009; 302: 741-749.  
14  
15  
16  
17  
18  
19 24. Bakitas MA, Tosteson TD, Li Z et al. Early Versus Delayed Initiation of Concurrent Palliative  
20 Oncology Care: Patient Outcomes in the ENABLE III Randomized Controlled Trial. J Clin Oncol  
21 2015; 33: 1438-1445.  
22  
23  
24  
25  
26  
27 25. Tattersall M, Martin A, Devine R et al. Early contact with palliative care services: a randomised  
28 trial in patients with newly detected incurable metastatic cancer. 2014  
29  
30  
31  
32  
33 26. McCorkle R, Jeon S, Ercolano E et al. An Advanced Practice Nurse Coordinated Multidisciplinary  
34 Intervention for Patients with Late-Stage Cancer: A Cluster Randomized Trial. J Palliat Med  
35 2015; 18: 962-969.  
36  
37  
38  
39  
40  
41 27. Hui D, Mori M, Watanabe SM et al. Referral criteria for outpatient specialty palliative cancer care:  
42 an international consensus. The Lancet Oncology 2016; 17: e552-e559.  
43  
44  
45  
46  
47 28. Kaasa S, Loge JH, Aapro M et al. Integration of oncology and palliative care: a Lancet Oncology  
48 Commission. Lancet Oncol 2018; 19: e588-e653.  
49  
50  
51  
52 29. Hannon B, Swami N, Rodin G et al. Experiences of patients and caregivers with early palliative  
53 care: A qualitative study. Palliat Med 2017; 31: 72-81.  
54  
55  
56  
57  
58  
59  
60

- 1  
2  
3 30. Hoerger M, Greer JA, Jackson VA et al. Defining the Elements of Early Palliative Care That Are  
4  
5 Associated With Patient-Reported Outcomes and the Delivery of End-of-Life Care. *J Clin Oncol*  
6  
7 2018; 36: 1096-1102.  
8  
9  
10  
11 31. Costantini M, Apolone G, Tanzi S et al. Is early integration of palliative care feasible and  
12  
13 acceptable for advanced respiratory and gastrointestinal cancer patients? A phase 2 mixed-  
14  
15 methods study. *Palliat Med* 2018; 32: 46-58.  
16  
17  
18  
19 32. Wentlandt K, Krzyzanowska MK, Swami N et al. Referral practices of oncologists to specialized  
20  
21 palliative care. *Journal of clinical Oncology* 2012; 30: 4380-4386.  
22  
23  
24  
25 33. Ullgren H, Kirkpatrick L, Kilpelainen S, Sharp L. Working in silos? - Head & Neck cancer  
26  
27 patients during and after treatment with or without early palliative care referral. *Eur J Oncol Nurs*  
28  
29 2017; 26: 56-62.  
30  
31  
32  
33 34. Lally K, Chua IS, Lin NU et al. Using Quality Improvement to Increase Access to Palliative Care.  
34  
35 *JCO Oncol Pract* 2021; 17: 107-110.  
36  
37  
38  
39 35. Mayland CR, Ho QM, Doughty HC et al. The palliative care needs and experiences of people with  
40  
41 advanced head and neck cancer: A scoping review. *Palliat Med* 2021; 35: 27-44.  
42  
43  
44  
45 36. Salins N, Ghoshal A, Hughes S, Preston N. How views of oncologists and haematologists impacts  
46  
47 palliative care referral: a systematic review. *BMC Palliat Care* 2020; 19: 175-020-00671-5.  
48  
49  
50  
51 37. Kayastha N, LeBlanc TW. When to Integrate Palliative Care in the Trajectory of Cancer Care.  
52  
53 *Curr Treat Options Oncol* 2020; 21: 41-020-00743-x.  
54  
55  
56  
57 38. Silva TH, Peres WAF, Rosa KSDC et al. Advanced Stage of Disease and Systemic Inflammation  
58  
59 as Factors Associated With Referral of Patients With Colorectal Cancer to a Palliative Care Unit.  
60  
*Am J Hosp Palliat Care* 2020; 37: 859-865.

- 1  
2  
3 39. Ostgathe C, Wendt KN, Heckel M et al. Identifying the need for specialized palliative care in adult  
4  
5 cancer patients - development and validation of a screening procedure based on proxy assessment  
6  
7 by physicians and filter questions. *BMC Cancer* 2019; 19: 646-019-5809-8.  
8  
9  
10 40. Glare PA, Chow K. Validation of a Simple Screening Tool for Identifying Unmet Palliative Care  
11  
12 Needs in Patients With Cancer. *J Oncol Pract* 2015; 11: e81-6.  
13  
14  
15  
16 41. Zalenski R, Courage C, Edelen A et al. Evaluation of screening criteria for palliative care  
17  
18 consultation in the MICU: a multihospital analysis. *BMJ Support Palliat Care* 2014; 4: 254-262.  
19  
20  
21  
22 42. Milnes S, Orford NR, Berkeley L et al. A prospective observational study of prevalence and  
23  
24 outcomes of patients with Gold Standard Framework criteria in a tertiary regional Australian  
25  
26 Hospital. *BMJ Support Palliat Care* 2019; 9: 92-99.  
27  
28  
29  
30 43. Meffert C, Rucker G, Hatami I, Becker G. Identification of hospital patients in need of palliative  
31  
32 care--a predictive score. *BMC Palliat Care* 2016; 15: 21-016-0094-7.  
33  
34  
35  
36 44. Flaherty C, Fox K, McDonah D, Murphy J. Palliative Care Screening: Appraisal of a tool to  
37  
38 identify patients' symptom management and advance care planning needs. *Clin J Oncol Nurs*  
39  
40 2018; 22  
41  
42  
43  
44 45. Lambert S, Bellamy T, Girgis A. Routine assessment of unmet needs in individuals with advanced  
45  
46 cancer and their caregivers: A qualitative study of the palliative care needs assessment tool (PC-  
47  
48 NAT). *J Psychosoc Oncol* 2018; 36: 82-96.  
49  
50  
51  
52 46. Molin Y, Gallay C, Gautier J et al. PALLIA-10, a screening tool to identify patients needing  
53  
54 palliative care referral in comprehensive cancer centers: A prospective multicentric study  
55  
56 (PREPA-10). *Cancer medicine* 2019; 8: 2950-2961.  
57  
58  
59  
60

- 1  
2  
3 47. Marshall TF, Alfano CM, Sleight AG et al. Consensus-building efforts to identify best tools for  
4  
5 screening and assessment for supportive services in oncology. *Disabil Rehabil* 2020; 42: 2178-  
6  
7 2185.  
8  
9  
10  
11 48. Carrasco-Zafra MI, Gómez-García R, Ocaña-Riola R et al. Level of Palliative Care Complexity in  
12  
13 Advanced Cancer Patients: A Multinomial Logistic Analysis. *J Clin Med* 2020; 9: 1960. doi:  
14  
15 10.3390/jcm9061960.  
16  
17  
18  
19 49. Le QV, Trinh HL, Mai KNT et al. Screening Patients With Cancer Admitted to Hanoi Medical  
20  
21 University Hospital for Palliative Care Needs. *JCO Global Oncology* 2020; 6: 1321-1327.  
22  
23  
24  
25 50. Kwon JH, Baek SK, Kim DY et al. Pilot study for the Psychometric Validation of the Sheffield  
26  
27 Profile for Assessment and Referral to Care (SPARC) in Korean Cancer Patients. *Cancer Res*  
28  
29 *Treat* 2021; 53: 25-31.  
30  
31  
32  
33 51. Paiva CE, Paiva BSR, Menezes D et al. Development of a screening tool to improve the referral of  
34  
35 patients with breast and gynecological cancer to outpatient palliative care. *Gynecol Oncol* 2020;  
36  
37 158: 153-157.  
38  
39  
40  
41 52. Dudgeon D. The impact of measuring patient-reported outcome measures on quality of and access  
42  
43 to palliative care. *J Palliat Med* 2018; 21: S-76-S-80.  
44  
45  
46  
47 53. Kamal AH, Bausewein C, Casarett DJ et al. Standards, Guidelines, and Quality Measures for  
48  
49 Successful Specialty Palliative Care Integration Into Oncology: Current Approaches and Future  
50  
51 Directions. *J Clin Oncol* 2020; 38: 987-994.  
52  
53  
54  
55 54. Hui D, Anderson L, Tang M et al. Examination of referral criteria for outpatient palliative care  
56  
57 among patients with advanced cancer. *Supportive Care in Cancer* 2020; 28: 295-301.  
58  
59  
60

- 1  
2  
3 55. Singh S, Rodriguez A, Lee D et al. Usefulness of the surprise question on an inpatient oncology  
4 service. *American Journal of Hospice and Palliative Medicine*® 2018; 35: 1421-1425.  
5  
6  
7  
8 56. Rauenzahn SL, Schmidt S, Aduba IO et al. Integrating palliative care services in ambulatory  
9 oncology: an application of the Edmonton Symptom Assessment System. *Journal of oncology*  
10 practice 2017; 13: e401-e407.  
11  
12  
13  
14  
15  
16 57. Beeler PE, Bates DW, Hug BL. Clinical decision support systems. *Swiss Med Wkly* 2014; 144:  
17 w14073.  
18  
19  
20  
21  
22 58. De Conno F, Ripamonti C, Caraceni A, Saita L. Palliative care at the National Cancer Institute of  
23 Milan. *Supportive care in cancer* 2001; 9: 141-147.  
24  
25  
26  
27  
28 59. Caraceni A, Lo Dico S, Zecca E et al. Outpatient palliative care and thoracic medical oncology:  
29 Referral criteria and clinical care pathways. *Lung Cancer* 2020; 139: 13-17.  
30  
31  
32  
33  
34  
35  
36  
37  
38  
39  
40  
41  
42  
43  
44  
45  
46  
47  
48  
49  
50  
51  
52  
53  
54  
55  
56  
57  
58  
59  
60

1  
2  
3  
4  
5  
6  
7  
8  
9  
10  
11  
12  
13  
14  
15  
16  
17  
18  
19  
20  
21  
22  
23  
24  
25  
26  
27  
28  
29  
30  
31  
32  
33  
34  
35  
36  
37  
38  
39  
40  
41  
42  
43  
44  
45  
46  
47  
48  
49  
50  
51  
52  
53  
54  
55  
56  
57  
58  
59  
60

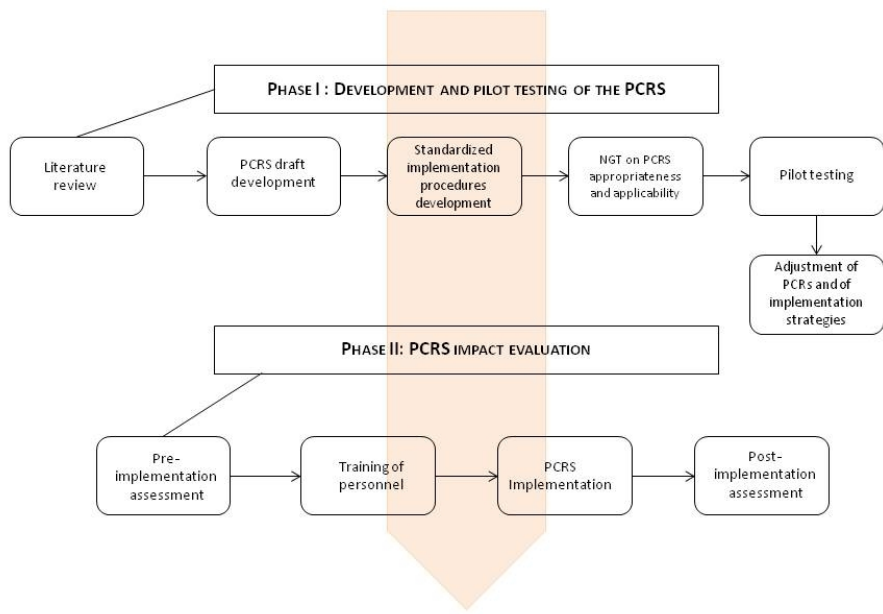

Figure 1: Project scheme  
254x190mm (96 x 96 DPI)



# BMJ Open

## Outpatient Palliative Care Referral System (PCRS) for patients with advanced cancer. An impact evaluation protocol.

|                                 |                                                                                                                                                                                                                                                                                                                                                                                                                                                                                                                                                                                                                                                                                                                                                                                                                                                                                                                                                                                                                                                                                                                                                                                                                                                                                                                                                                                                                                                                                                                                                                                       |
|---------------------------------|---------------------------------------------------------------------------------------------------------------------------------------------------------------------------------------------------------------------------------------------------------------------------------------------------------------------------------------------------------------------------------------------------------------------------------------------------------------------------------------------------------------------------------------------------------------------------------------------------------------------------------------------------------------------------------------------------------------------------------------------------------------------------------------------------------------------------------------------------------------------------------------------------------------------------------------------------------------------------------------------------------------------------------------------------------------------------------------------------------------------------------------------------------------------------------------------------------------------------------------------------------------------------------------------------------------------------------------------------------------------------------------------------------------------------------------------------------------------------------------------------------------------------------------------------------------------------------------|
| Journal:                        | <i>BMJ Open</i>                                                                                                                                                                                                                                                                                                                                                                                                                                                                                                                                                                                                                                                                                                                                                                                                                                                                                                                                                                                                                                                                                                                                                                                                                                                                                                                                                                                                                                                                                                                                                                       |
| Manuscript ID                   | bmjopen-2021-059410.R2                                                                                                                                                                                                                                                                                                                                                                                                                                                                                                                                                                                                                                                                                                                                                                                                                                                                                                                                                                                                                                                                                                                                                                                                                                                                                                                                                                                                                                                                                                                                                                |
| Article Type:                   | Protocol                                                                                                                                                                                                                                                                                                                                                                                                                                                                                                                                                                                                                                                                                                                                                                                                                                                                                                                                                                                                                                                                                                                                                                                                                                                                                                                                                                                                                                                                                                                                                                              |
| Date Submitted by the Author:   | 28-Sep-2022                                                                                                                                                                                                                                                                                                                                                                                                                                                                                                                                                                                                                                                                                                                                                                                                                                                                                                                                                                                                                                                                                                                                                                                                                                                                                                                                                                                                                                                                                                                                                                           |
| Complete List of Authors:       | Brunelli, Cinzia; Fondazione IRCCS Istituto Nazionale Tumori Milan Zecca, Ernesto; Fondazione IRCCS Istituto Nazionale dei Tumori, Pigni, Alessandra; Fondazione IRCCS Istituto Nazionale dei Tumori Bracchi, Paola; Fondazione IRCCS Istituto Nazionale dei Tumori Caputo, Mariangela; Fondazione IRCCS Istituto Nazionale dei Tumori Lo Dico, Silvia; Fondazione IRCCS Istituto Nazionale dei Tumori Fusetti, Viviana; Fondazione IRCCS Istituto Nazionale dei Tumori; Università degli Studi di Roma Tor Vergata Tallarita, Antonino; Fondazione IRCCS Istituto Nazionale dei Tumori, Bergamini, Cristiana; Fondazione IRCCS Istituto Nazionale dei Tumori, Medical Oncology Department Brambilla, Marta; Fondazione IRCCS Istituto Nazionale dei Tumori, Medical Oncology Department Raimondi, Alessandra; Fondazione IRCCS Istituto Nazionale dei Tumori, Medical Oncology Department Niger, Monica; Fondazione IRCCS Istituto Nazionale dei Tumori Provenzano, Salvatore; Fondazione IRCCS Istituto Nazionale dei Tumori, Medical Oncology Department Sepe, Pierangela; Fondazione IRCCS Istituto Nazionale dei Tumori, Medical Oncology Department Alfieri, Sara; Fondazione IRCCS Istituto Nazionale dei Tumori Tinè, Gabriele; Fondazione IRCCS Istituto Nazionale dei Tumori De Braud, Filippo; Fondazione IRCCS Istituto Nazionale dei Tumori, Medical Oncology Department; Università degli Studi di Milano Caraceni, A; Fondazione IRCCS Istituto Nazionale dei Tumori, Milan, Italy, Palliative Care, Pain Therapy and Rehabilitation; Università degli Studi di Milano |
| <b>Primary Subject Heading</b>: | Palliative care                                                                                                                                                                                                                                                                                                                                                                                                                                                                                                                                                                                                                                                                                                                                                                                                                                                                                                                                                                                                                                                                                                                                                                                                                                                                                                                                                                                                                                                                                                                                                                       |
| Secondary Subject Heading:      | Oncology, Qualitative research                                                                                                                                                                                                                                                                                                                                                                                                                                                                                                                                                                                                                                                                                                                                                                                                                                                                                                                                                                                                                                                                                                                                                                                                                                                                                                                                                                                                                                                                                                                                                        |
| Keywords:                       | Adult palliative care < PALLIATIVE CARE, Adult oncology < ONCOLOGY, QUALITATIVE RESEARCH                                                                                                                                                                                                                                                                                                                                                                                                                                                                                                                                                                                                                                                                                                                                                                                                                                                                                                                                                                                                                                                                                                                                                                                                                                                                                                                                                                                                                                                                                              |
|                                 |                                                                                                                                                                                                                                                                                                                                                                                                                                                                                                                                                                                                                                                                                                                                                                                                                                                                                                                                                                                                                                                                                                                                                                                                                                                                                                                                                                                                                                                                                                                                                                                       |

1  
2  
3  
4  
5  
6  
7  
8  
9  
10  
11  
12  
13  
14  
15  
16  
17  
18  
19  
20  
21  
22  
23  
24  
25  
26  
27  
28  
29  
30  
31  
32  
33  
34  
35  
36  
37  
38  
39  
40  
41  
42  
43  
44  
45  
46  
47  
48  
49  
50  
51  
52  
53  
54  
55  
56  
57  
58  
59  
60



1  
2  
3 **Outpatient Palliative Care Referral System (PCRS) for patients with advanced cancer. An**  
4 **impact evaluation protocol.**  
5  
6  
7

8  
9 Cinzia Brunelli<sup>1\*</sup>, Ernesto Zecca<sup>1\*</sup>, Alessandra Pigni<sup>1</sup>, Paola Bracchi<sup>1</sup>, Mariangela Caputo<sup>1</sup>, Silvia  
10 Lo Dico<sup>1</sup>, Viviana Fusetti<sup>1</sup>, Antonino Tallarita<sup>1</sup>, Cristiana Bergamini<sup>2</sup>, Marta Brambilla<sup>2</sup>,  
11 Alessandra Raimondi<sup>2</sup>, Monica Niger<sup>2</sup>, Salvatore Provenzano<sup>2</sup>, Pierangela Sepe<sup>2</sup>, Sara Alfieri<sup>3</sup>,  
12 Gabriele Tinè<sup>4</sup>, Filippo De Braud<sup>2,5</sup> and Augusto Caraceni<sup>1,5</sup>  
13  
14  
15

16 \* Equally first Authors  
17  
18

19 <sup>1</sup> Palliative care, Pain Therapy and Rehabilitation Unit, Fondazione IRCCS Istituto Nazionale dei Tumori,  
20 Milan, Italy.  
21

22 <sup>2</sup> Medical Oncology Department, Fondazione IRCCS Istituto Nazionale dei Tumori, Milan, Italy.  
23

24 <sup>3</sup> Clinical Psychology Unit, Fondazione IRCCS Istituto Nazionale dei Tumori, Milan, Italy.  
25

26 <sup>4</sup> Unit of Clinical Epidemiology and Trial Organisation, Fondazione IRCCS Istituto Nazionale dei Tumori,  
27 Milan, Italy.  
28

29 <sup>5</sup> Università degli Studi di Milano , Milan, Italy.  
30

31 **Corresponding author**

32 Ernesto Zecca, MD

33 Palliative care, Pain Therapy and Rehabilitation Unit,

34 Fondazione IRCCS Istituto Nazionale dei Tumori

35 via Venezian, 1- 20133 Milano, Italy

36 ernesto.zecca@istitutotumori.mi.it  
37  
38  
39  
40

41 **Key words:**

42 early outpatient palliative care, advanced cancer, referral, oncology palliative care integration  
43  
44  
45  
46  
47  
48  
49  
50  
51  
52  
53  
54  
55  
56  
57  
58  
59  
60

## Abstract

**Introduction.** Early palliative care (PC) in the clinical pathway of advanced cancer patients improves symptom control, quality of life and has a positive impact on overall quality of care. At present, standardized criteria for appropriate referral for early PC in oncology care are lacking. The aim of this project is to develop a set of standardized referral criteria and procedures to implement appropriate early PC for advanced cancer patients (the Palliative Care Referral System, PCRS) and test its impact on user perception of quality of care received, on patient quality of life and on the use of healthcare resources.

**Setting.** Selected oncology clinics and palliative care outpatient clinic.

**Methods and analysis.** A scoping literature review and an expert consultation through a nominal group technique will be used to revise existing referral tools and to develop a new one, the PCRS. 25 patients will be enrolled in a pilot study to assess feasibility of the implementation of PCRS; 10 interviews with patients and health care professionals will be carried out to evaluate applicability. A pretest-posttest quasi-experimental study involving 150 patients before implementation of the PCRS and 150 patients after implementation will be carried out.

Patient satisfaction with care received, quality of life and use of resources, and caregiver satisfaction with care will also be assessed to explore the impact of the intervention.

**Ethics and dissemination.** Ethical approval for the study has been granted by the Institutional Review board of the Fondazione IRCCS Istituto Nazionale Tumori; approval reference INT201/19. Results will be disseminated through open access publications and through scientific communication presented at national and international conferences.

**Trial Registration.** The pretest-posttest trial was registered on ClinicalTrials.gov database (NCT04936568).

1  
2  
3  
4  
5  
6  
7  
8  
9  
10  
11  
12  
13  
14  
15  
16  
17  
18  
19  
20  
21  
22  
23  
24  
25  
26  
27  
28  
29  
30  
31  
32  
33  
34  
35  
36  
37  
38  
39  
40  
41  
42  
43  
44  
45  
46  
47  
48  
49  
50  
51  
52  
53  
54  
55  
56  
57  
58  
59  
60

| Strengths and limitations of this study                                                                                                                                                                                                                                                                                                                                                                                                                                                                                                                     |
|-------------------------------------------------------------------------------------------------------------------------------------------------------------------------------------------------------------------------------------------------------------------------------------------------------------------------------------------------------------------------------------------------------------------------------------------------------------------------------------------------------------------------------------------------------------|
| <ul style="list-style-type: none"><li>➤ The development of the palliative care referral system (PCRS) is based on published evidence and consensus among oncology and palliative care professionals.</li><li>➤ Nominal group technique is particularly adequate to reach clinical practice consensus for subsequent implementation.</li><li>➤ The pre and post-implementation study can provide evidence on the feasibility of the PCRS and its clinical impact.</li><li>➤ Limitations include the single-centre and non-randomized study design.</li></ul> |

- For peer review only

## Introduction

Palliative care (PC) is aimed at reducing or preventing suffering and improving quality of life for patients affected by incurable advanced illnesses and their caregivers. Traditionally PC has been limited to the terminal phase of illness with an unclear impact on overall disease trajectory. In recent years the term “early palliative care” has been coined to describe an anticipated approach to PC in the care pathway of advanced diseases. In the case of advanced cancer, this means that PC can already start along with treatments such as chemotherapy, radiotherapy and other disease modifying interventions, planned for the management of advanced disease [1].

According to the latest American Society of Clinical Oncology consensus on integration of PC into standard oncology care, PC is defined early when administered within eight weeks from the diagnosis of advanced cancer, a definition that is too generic to be operationally implemented [2]. As shown in systematic literature reviews [1] randomized controlled trials demonstrate that the introduction of outpatient PC from the time of diagnosis of advanced cancer is associated with benefit on several clinical and care dimensions [1].

On the other hand, early PC is associated with less aggressive cancer treatment at the end of life, such as reduced use of chemotherapy in the last weeks of life and reduced access to intensive care units and emergency rooms [3].

Despite the evidence on the benefit of early PC, there is no standard definition of how oncologists should decide to refer patients to the PC specialist once advanced or metastatic disease is diagnosed. To optimize the potential impact of EPC on the overall care pathway, it would be important to combine the capacity of PC teams to participate timely in the shared decision-making process (including patient, family and attending oncologist), and, at the same time, the capacity of the multidisciplinary oncology team to integrate the advice of the PC specialist [4].

Without a suitable patient selection process for palliative care referral, outpatient palliative care services may be overwhelmed by excessive and perhaps inappropriate requests or, alternatively, resources could be underutilized if referrals do not occur. At present the volume and timing of referral to outpatient PC for cancer patients vary widely among services. This can be in part explained by the lack of standardized referral criteria for outpatient PC, coupled with variable oncologists’ attitudes and beliefs about PC and differences in models and availability of PC services [4].

It would be desirable to provide a personalized care plan for each patient, taking into account different diseases trajectories and identifying the timing and the ways in which patients can be referred to PC. Criteria establishing the right moment for the right patient for referral including are

1  
2  
3 needed to personalize care pathways and optimize resource allocations to improve care outcomes.

4  
5 This project has a twofold aim:

- 6  
7 1. To develop and study the feasibility of a standardized palliative care referral system (PCRS)  
8 for outpatient PC in advanced cancer patients.
- 9  
10 2. To evaluate the impact of routine application of the PCRS in a population of patients cared  
11 for in a comprehensive cancer centre.

## 12 13 14 15 **Methods and analysis**

16  
17 The project has been organized into two main sequential phases and second level steps as  
18 reported in Figure 1. The study intervention will be applied within several selected oncology clinics  
19 covering both frequent and rare cancers (lung, gastrointestinal, genitourinary, head & neck and  
20 sarcoma) and the PC outpatient clinic. In our PC clinic patients regularly encounter PC specialists  
21 and are assessed by nurses for symptoms and psychosocial dimension using validated self reported  
22 questionnaires [5]. Psychological consult is also available as needed. For each oncology clinic one  
23 oncologist will participate directly in the study procedures.

24  
25  
26  
27  
28  
29  
30  
31 - Insert Figure 1 around here -  
32  
33

### 34 **Phase I: Development and pilot testing of the PCRS**

35  
36 Criteria used for PC referral in advanced cancer patients will be identified through a scoping  
37 review of the literature on existing PC needs screening tools and methods (Table 1). The choice of  
38 the criteria that will constitute the PCRS will be based on their clinical relevance and prognostic  
39 value; existing criteria will be modified if needed. A first draft of the PCRS tool will be developed  
40 and its appropriateness and feasibility in routine clinical practice will be evaluated using Nominal  
41 group technique (NGT) [6] carried out with different health care providers (oncologists, PC  
42 specialists, nurses and psychologist) with extensive experience in oncology and palliative care.  
43 NGT is a qualitative research methodology aimed at verifying the possible convergence of a group  
44 of experts on an idea, judgment or proposal. NGT consists of six stages [7]: 1. Presentation of the  
45 nominal question; 2. Individual generation of ideas or voting; 3. Round-robin feedback from  
46 participants to record each idea/voting; 4. Group discussion of each idea/voting in turn for  
47 clarification and evaluation; 5. Individual voting on priority ideas with the group decision derived  
48 through rank-ordering or rating; 6. Sharing of results, further discussion and re-voting. Based on the  
49 NGT results, the PCRSs will be adjusted/modified as needed and standard implementation  
50  
51  
52  
53  
54  
55  
56  
57  
58  
59  
60

1  
2  
3 procedures will be developed.

4  
5 Then a pilot cross-sectional feasibility study on the application of the PCRS will be carried  
6 out on 5 consecutive patients in each of the 5 outpatient clinics that will be involved in the Phase II  
7 of the project. Feasibility assessment will include: time needed to screen the patient, number of  
8 patients for which the screening was complete, number of missing data for each criterion.  
9  
10 Acceptability of PCRS by patients and by health care professionals, as well as integration of the  
11 assessment procedure with routine clinical practice will also be evaluated through debriefing  
12 interviews with 5 patients and 5 health care professionals. A final revision of the PCRS and of its  
13 implementation procedure by the study group will follow the pilot testing.  
14  
15  
16  
17  
18  
19

## 20 **Phase II: PCRS implementation and impact evaluation.**

21  
22 The potential impact of the PCRS will be explored using a quasi-experimental study design  
23 measuring study endpoints before and after PCRS implementation (Figure 1).  
24

### 25 Study design and patient population

26  
27 A longitudinal pretest-posttest design will be carried out. Two different cohorts of advanced  
28 cancer patients will be enrolled before (pretest) and after (posttest) the introduction of the PCRS in  
29 outpatient clinics. Patient inclusion criteria are: age >18 years; diagnosis of inoperable locally  
30 advanced and/or metastatic cancer. Exclusion criteria: eligibility to anticancer treatment with  
31 advanced and/or metastatic cancer. Exclusion criteria: eligibility to anticancer treatment with  
32 curative intent; patients already enrolled in a PC program; cognitive impairment.  
33  
34  
35

### 36 PCRS implementation

37  
38 For implementing the PCRS, patient clinical assessment will be performed initially by a  
39 nurse, collecting self reported questionnaires and partially completing the PCRS. This evaluation  
40 will be entered in the electronic medical records and then integrated and validated by the oncologist  
41 during the visit. The oncologist will finally decide to refer or not the patient to PC using the PCRS  
42 predefined criteria and his or her clinical judgment.  
43  
44  
45

### 46 Study Outcomes and assessment methods

47  
48 The following outcomes will be evaluated: patient's satisfaction with care (main outcome), patient's  
49 quality of life, caregiver's satisfaction with care, use of health care resources, and end of life care  
50 quality indicators.  
51  
52

53  
54 The FAMCARE-P13 will be used to assess patient satisfaction with care in the present  
55 study. It is a 13 item self-report questionnaire, developed to be used with advanced cancer patients  
56 [8]. Its items are rated from 1 (very dissatisfied) to 5 (very satisfied) producing a single satisfaction  
57 score ranging from 13 to 65.  
58  
59  
60



1  
2  
3 The EORTC Quality of Life Questionnaire Core 15 for Palliative Care (QLQ-C15-PAL) [9]  
4 will be used to evaluate patients' quality of life. QLQ-C15-PAL is an abbreviated 15-item version  
5 of EORTC-QLQC30 specifically developed for use in a palliative care setting. It includes two  
6 multi-item functional scales (physical and emotional functioning), two multi-item symptom scales  
7 (fatigue and pain), five single-item symptom scales (nausea/vomiting, dyspnoea, insomnia, appetite  
8 loss and constipation) and a question regarding overall QoL (global health status). Items are rated  
9 on a Likert scale from 1 (not at all) to 4 (very much) with the exception of global health status,  
10 which is rated from 1 (very poor) to 7 (excellent).  
11  
12

13  
14  
15  
16  
17 Family satisfaction with care will be assessed with the FAMCARE scale [10, 11]. It is a self-  
18 assessment satisfaction composed of 20 items rated according to a 5-point Likert scale from 1 (very  
19 satisfied) to 5 (very dissatisfied). The items are grouped into four subscales: Physical patient care,  
20 Information giving, Availability of care and Psychosocial care subscale.  
21  
22 The FAMCARE Scale can be administered to family members while a patient is receiving palliative  
23 care or at some point after a patient's death.  
24  
25  
26

27  
28 All tools applied are validated in Italian language but the FAMCARE P-13, which will be  
29 culturally adapted from English using "forward-backward" translation method [12] as part of the  
30 present project; basic psychometric properties will be assessed as well.  
31  
32

33 Use of health care resources during study follow-up will be monthly assessed by a dedicated  
34 research nurse with an ad-hoc developed form reporting: access to a PC service (regular outpatient  
35 PC visits, home care, hospice admission), number of multidisciplinary team visits (oncology and  
36 PC), number of hospitalization and of emergency department admission, with reason and duration..  
37  
38

39 For those patients who will die during the follow-up period, a dedicated research nurse will  
40 collect the following data relative to the last 30 days of life: active oncological treatments  
41 administration (chemotherapy, radiotherapy, immunotherapy, etc.) and date of last administration,  
42 number of ER visits, hospitalization (number and length in days), activation of any PC service  
43 (home care or hospice) and place of death. The above information will allow us to calculate end-of-  
44 life care quality indicators, like the proportions of patients with chemotherapy in the last 14 days of  
45 life [3].  
46  
47  
48  
49  
50

51  
52 - Insert Table 1 around here -  
53  
54

55 For all data to be collected, Table 1 reports the assessment tools and the timing of various  
56 assessments. Eligible patients will undergo FAMCARE P-13 and EORTC QLQC15-PAL  
57 evaluation at baseline and then monthly for at least 6 months from enrollment or till death (T1, T2,  
58  
59  
60

1  
2  
3 T3, T4, T5, T6). The choice of interviewing patients every month is suggested by the need to  
4 minimize attrition due to potential patients drop out and also to take into account the frequent  
5 possible changes in clinical conditions in a fragile patient population. FAMCARE will be  
6 administered to the main caregiver identified by the patient at T0, T3 and T6 or after patient's  
7 death in patients who will die during the follow-up. Patient and caregiver reported outcomes will  
8 be collected through telephone interview. This method was chosen in order to avoid contamination  
9 between the pre- and post- PCRS implementation groups; in fact the PCRS implementation in the  
10 posttest group will be based also on patient reported symptom assessment which will be  
11 electronically collected [13]. Health care professional reported data will be collected using  
12 REDCap electronic data capture tools hosted at Fondazione IRCCS Istituto Nazionale dei Tumori  
13 of Milan

14  
15  
16  
17  
18  
19  
20  
21 The planned duration of the entire project, considering phase 1 and phase 2, is 4 years (15  
22 September 2020-14 September 2024)  
23  
24  
25  
26  
27  
28  
29  
30  
31  
32  
33  
34  
35  
36  
37  
38  
39  
40  
41  
42  
43  
44  
45  
46  
47  
48  
49  
50  
51  
52  
53  
54  
55  
56  
57  
58  
59  
60

| DATA                               | REPORTED BY | TOOL               | T0<br>Baseline | T1<br>30±3days | T2<br>60±3days | T3<br>90±3days | T4<br>120±3days | T5<br>150±3days | T6<br>180±3days | EOS (*) |
|------------------------------------|-------------|--------------------|----------------|----------------|----------------|----------------|-----------------|-----------------|-----------------|---------|
| Socio-Demographic                  | PATIENT     | Ad hoc form (eCRF) | X              |                |                |                |                 |                 |                 |         |
| Clinical                           | RN/MD       | Ad hoc form (eCRF) | X              | X              | X              | X              | X               | X               | X               |         |
| Patient satisfaction with care     | PATIENT     | FAMCARE P13        | X              | X              | X              | X              | X               | X               | X               |         |
| Quality of life                    | PATIENT     | EORTC-C15 PAL      | X              | X              | X              | X              | X               | X               | X               |         |
| Caregiver satisfaction with care   | CAREGIVER   | FAMCARE            | X              |                |                | X              |                 |                 | X               | (X)     |
| Use of health care resources       | RN          | Ad hoc form (eCRF) |                | X              | X              | X              | X               | X               | X               |         |
| End of life care quality indicator | RN          | Ad hoc form (eCRF) |                |                |                |                |                 |                 |                 | (X)     |

**Table 1: Data collection during study period**

Legenda: RN = research nurse; MD = medical doctor; eCRF = electronic case report forms; EOS = End of study;

\* End of study assessments will be performed only for those patients who die within the study follow-up period.

### Power considerations and statistical analysis

The main endpoint is the variation in patient's satisfaction between baseline and the average of repeated follow-up assessments. t-test for independent samples on this endpoint will be used to compare pre- and post- referral patient cohorts. Power calculations [14] indicate that 150 patients in each group will allow a two tailed t-test for independent samples, a power of 0.9 to detect an effect size of 0.375 with alpha error=0.05. In case of a 15% attrition rate the study power reduces at 85%, all else unchanged. The same analysis scheme will be applied for all continuous repeated measurement outcomes, while binary outcomes (i.e. activation of PC during follow-up or chemotherapy administration during the last month of life) will be analyzed using logistic regression models. Linear and logistic regression models will be used for covariate adjustment estimations.

### Data sharing

De-identified data of participants in this project will be available from the project principal investigator (AC) upon request, provided that the data reuse is in agreement the European General Data Protection Regulation 2016/679 (GDPR).

### Patient and public involvement

No patient nor other member of the public was involved in the development of this research project.

## **Discussion**

Early palliative care referral, while concurrent anti-neoplastic treatment is still possible and indicated, is considered to improve integration of palliative care in the clinical pathway of patients with advanced disease who cannot achieve cure with the available antineoplastic treatments [2]. This general statement is based on several clinical trials [1] showing advantages of early access to palliative care in improving patient's quality of life, psychological distress, use of health care resources at the end of life and caregivers' distress.

### Different early palliative care models

These trials were however based on different clinical models and settings. The model which was more consistently tested as an experimental intervention has been based on the access of patients to specialized palliative care outpatient clinic. In fact, the implementation of this model [15-22] has more consistently shown efficacy if compared with other interventions of care coordination without direct encounters between patients and palliative care professionals [23-26]. This has been also described as an "integrated care model" [27, 28].

Within the integrated model trials, the number and duration of encounters of patients with

1  
2  
3 palliative care professionals varied from 1 every 1.3 weeks to 1 every 6 weeks with a total mean  
4 number of visits during the study period ranging from 2.4 to 8.9. Two of the three negative studies  
5 on the integrated model [15, 21] resulted in very limited if any access to specialized palliative care  
6 visits. The third one acknowledged significant in between trial arms contamination [22].  
7  
8

9  
10 Also qualitative type evidences from the same trials support subjective appreciation of  
11 clinical value attributed by patients to integrated palliative care interventions. Patients and  
12 caregivers considered specialized outpatient palliative care capable of providing personalized and  
13 prompt symptom management, holistic support to patients and caregivers, guidance in decision  
14 making and preparation for the future [29]. Another study addressed specifically the clinical content  
15 of early outpatient palliative care and showed that interventions based on psychological and cognitive  
16 coping, disease understanding, decision making and care planning were associated with lower  
17 psychological distress and better use of health care resources at the end of life [30]. Finally, the study  
18 by Costantini et al. [31] shows that an early integration of specialized palliative care after the  
19 diagnosis of advanced cancer is feasible and well accepted by patients, relatives and, to a lesser  
20 extent, by oncologists.  
21  
22

### 23 Palliative care needs selection criteria

24  
25 Overall these data confirm the usefulness of the palliative care outpatient clinic approach,  
26 with specialized clinical skills and multidimensional assessment, for patients with advanced cancer  
27 but the selection criteria used in the clinical trials are difficult to translate into clinical practice. The  
28 trials aimed at demonstrating efficacy and detecting outcome changes at the group level, while  
29 statistically accounting for patients heterogeneity. In clinical practice the decision to refer a patient  
30 to palliative care outpatient clinic needs instead to be individualized. Therefore trials' result cannot  
31 clarify how to guarantee timely access at the individual level and to optimize resource allocation.  
32  
33 Trials are also not enough to change clinical practice, without taking into account practical and  
34 cultural barriers that impact on palliative care perception by oncologists and patients [28, 32].  
35  
36

37  
38 In summary the best ways to address earlier palliative care needs identification, timely  
39 access to outpatient palliative care and also to overcome barriers to integration with oncology are  
40 still unresolved issues, and yet late referral is considered to be a significant barrier in many cases  
41 [28, 32-36].  
42  
43

44  
45 The literature discussion about criteria to be used and the domains to be assessed, beyond the  
46 stage of the disease, already considered in all trials, includes symptoms, psychosocial distress,  
47 prognosis, trigger disease related events and critical care planning issues [4, 37-39]. A number of  
48 palliative care need screening and assessment instruments have been developed and sometimes  
49 tested [39-50] but only a few of them were specifically designed to improve appropriate selection of  
50  
51  
52  
53  
54  
55  
56  
57  
58  
59  
60

1  
2  
3 cancer patients for referral to outpatient specialized palliative care [4, 51]. In the study by Paiva et  
4 al., the use of the PC referral tool would have increased referral rate by 3.2 fold [51]. There are no  
5 studies nor agreed guidelines upon criteria to guide timely referral [48, 52, 53] beyond disease stage  
6 [2, 4].  
7  
8

9  
10 Hui et al. [27] published a Delphi study building a consensus on referral criteria among a  
11 number of palliative care expert identifying major and minor criteria and suggesting that referral  
12 should occur anytime one major criterion is met. The same Authors [54], in a retrospective  
13 assessment of the characteristics of patients referred to their palliative care clinic, found that 85%  
14 fulfilled one major criteria and that referral occurred as an average 14 months before death.  
15  
16

17  
18 Interestingly in the study by Singh et al [55] prognostic assessment alone using the  
19 Surprise question had no effect on referral to palliative care including the outpatient setting.  
20  
21

22 The only study looking at implementing an intervention to improve referral to ambulatory  
23 palliative care was planned by a cancer center in Texas as a quality improvement intervention,  
24 including, in a plan-do-study-act cycle, the adoption of a symptom assessment tool and a referral  
25 pathway in oncology clinics. Their initial results show a 10 fold increase of referrals after  
26 implementation, from 0.07% of all oncology clinic encounters to 0.8%. It is unclear how  
27 satisfactory this result can be considered, given the modest number of referrals, in particular  
28 because the relationship with high symptom score is not consistent with such a low referral rate.  
29 The study is still under development [56].  
30  
31

### 32 The PCRS project

33  
34 The primary aim of our study is therefore to develop and implement a palliative care referral  
35 system which takes into account the suggestions from the literature in combination with consensus  
36 between oncology and palliative care specialists. It is anticipated that in an implementation study  
37 with the aim of intervening on clinical practices, evidence based concepts need to be combined with  
38 professional interaction, knowledge of service availability, professional trust and resource allocation  
39 that avoid extra workload burden and alert fatigue [57].  
40  
41

42  
43 Palliative care integration has been available at our center since 2001 [58] and we recently  
44 described its operational characteristics on a consecutive lung cancer patients population seen at a  
45 thoracic oncology clinic. In a two year period, 43% of patients were referred to palliative care  
46 clinics, mainly for symptom control, usually pain and or dyspnoea, and poor performance status.  
47 The mean duration of outpatient palliative care was 128 days [59].  
48  
49

50  
51 The pre and post implementation study design in this protocol will give information on the  
52 feasibility of the PCRS, its impact on user experience of care, patient quality of life and use of  
53 health care resources. Ideally, a cluster randomized trial design would be preferable but at least  
54  
55  
56  
57  
58  
59  
60

1  
2  
3 6-8 first level units (hospitals) should be involved for the results to be robust, and this is beyond  
4 resources allocated to this research. An individually randomized design, instead, may not be  
5 adequate for the evaluation of a complex intervention with a high contamination risk.  
6  
7

8 Furthermore the evidence of the potential efficacy of PC referral implementation are still to be  
9 shown. Considering these limitations the aim of the study is not to provide a final estimate of the  
10 effectiveness of PC needs screening but to provide a first estimate of feasibility and impact.  
11  
12 Study completion would also allow the subsequent integration of the PCRS, or of some of its  
13 components [13], at the institutional level in order to steer a change in clinical practice to augment  
14 palliative and oncology integration and improve patient care.  
15  
16

17  
18 The study is part of a nationally funded program (Finalizzata di Rete – project ID NET-2018-  
19 12367032 to AC – funded by the Italian Ministry of Health and by Regione Lombardia) to address  
20 the recognition and response to palliative care needs in different patients populations and has the  
21 opportunity to raise awareness at the national level about the importance of palliative care  
22 integration at the outpatient level. The national program finalization could strengthen directions for  
23 the Ministry of Health to allocate resources for recognizing the lack of specialized palliative care  
24 services at acute hospitals and promoting their implementation.  
25  
26  
27  
28  
29  
30

31  
32 **Ethics and Dissemination** Ethical approval for the study has been granted by the Institutional  
33 Review board of the Fondazione IRCCS Istituto Nazionale Tumori, approval reference  
34 INT201/19.  
35  
36

37 The protocol of the pretest-posttest quasi-experimental design was registered on  
38 ClinicalTrials.gov database (NCT04936568).  
39  
40

41 Patients and caregivers will be enrolled in the pre-test and post-test after obtaining informed  
42 consent.  
43  
44

45 Dissemination of the study results will occur through publications in peer-reviewed open-access  
46 scientific journals and the presentation of data at national and international conferences.  
47  
48  
49

### 50 **Funding**

51 This study is part of a national program funded by the Italian Ministry of Health and by Regione  
52 Lombardia (project ID NET-2018-12367032 to AC).  
53  
54  
55

### 56 **Author Contributions**

57  
58 Conceptualization: CB, EZ, AP, PB, MC, SLD, VF, AT, CBe, MB, AR, MN, PS, SP, SA, GT,  
59 FDB, AC  
60



1  
2  
3 Writing—original draft preparation: CB, EZ, AP, PB, MC, SLD, VF, CBe, MB, AR, MN, PS, SP,  
4 SA, GT, FDB, AC

5  
6 Writing—review and editing: CB, EZ, AP, PB, MC, SLD, VF, CBe, MB, AR, MN, PS, SP, SA,  
7 GT, FDB, AC

8  
9 Supervision: CB, EZ, AC

10  
11 All authors have read and agreed to the published version of the manuscript.  
12  
13

## 14 15 **Conflicts of Interest**

16  
17 AC has received consultant honoraria from Mundipharma, Pfizer/Eli Lilly Italia Spa, Angelini,  
18 Shionogi, Molteni and Kyowa Kirin. He has also received research grants from Molteni & C Soc  
19 Esercizio Spa and Ipsen.  
20

21  
22 EZ has received consultant honoraria from Amgen.  
23

24 MN has received travel expenses from Celgene, speaker honorarium from Accademia della  
25 Medicina and consultant honoraria from EMD Serono, Basilea Pharmaceutica, Incyte and MSD  
26 Italia.  
27

28  
29 FDB has received consultant honoraria from Roche, EMD Serono, NMS Nerviano Medical  
30 Science, Sanofi, MSD, Novartis and Incyte. He has received speaker honoraria from BMS,  
31 Healthcare Research & Pharmacoepidemiology, Merck Group, ACCMED, Nadirex, MSD, Pfizer,  
32 Servier, Sanofi, Roche and AMGEN. He has also received research grants from Novartis, Roche,  
33 BMS, Celgene, Incyte, NMS, Merck KGAA, Kymab, Pfizer, Tesaro and MSD.  
34  
35

36  
37 AP, PB, MC, SLD, VF, CBe, MB, PS, SP, SA, AR, GT and CB declare no conflicts of interest.  
38  
39

40  
41 Figure 1: Project scheme  
42  
43

44  
45 Word Count: 3672  
46  
47

## 48 **References**

- 49  
50 1. Haun MW, Estel S, Rucker G et al. Early palliative care for adults with advanced cancer. Cochrane  
51 Database Syst Rev 2017; 6: CD011129.  
52  
53  
54  
55 2. Ferrell BR, Temel JS, Temin S, Smith TJ. Integration of Palliative Care Into Standard Oncology  
56 Care: ASCO Clinical Practice Guideline Update Summary. J Oncol Pract 2017; 13: 119-121.  
57  
58  
59  
60



- 1  
2  
3 3. Earle CC, Landrum MB, Souza JM et al. Aggressiveness of cancer care near the end of life: is it a  
4  
5 quality-of-care issue? *J Clin Oncol* 2008; 26: 3860-3866.  
6  
7
- 8  
9 4. Hui D, Meng YC, Bruera S et al. Referral Criteria for Outpatient Palliative Cancer Care: A  
10  
11 Systematic Review. *Oncologist* 2016; 21: 895-901.  
12  
13
- 14  
15 5. US Department of Health and Human Services FDA Center for Drug Evaluation and Research, US  
16  
17 Department of Health and Human Services FDA Center for Biologics Evaluation and Research.  
18  
19 US Department of Health and Human Services FDA Center for Devices and Radiological Health.  
20  
21 Guidance for industry: patient-reported outcome measures: use in medical product development to  
22  
23 support labeling claims: draft guidance. *Health Qual Life Outcomes* 2006; 4: 79.  
24  
25
- 26  
27 6. Van de Ven AH, Delbecq AL. The nominal group as a research instrument for exploratory health  
28  
29 studies. *Am J Public Health* 1972; 62: 337-342.  
30  
31
- 32  
33 7. Cantrill J, Sibbald B, Buetow S. The Delphi and nominal group techniques in health services  
34  
35 research. *International Journal of pharmacy practice* 1996; 4: 67-74.  
36  
37
- 38  
39 8. Lo C, Burman D, Hales S et al. The FAMCARE-Patient scale: measuring satisfaction with care of  
40  
41 outpatients with advanced cancer. *Eur J Cancer* 2009; 45: 3182-3188.  
42  
43
- 44  
45 9. Groenvold M, Petersen MA, Aaronson NK et al. The development of the EORTC QLQ-C15-PAL:  
46  
47 A shortened questionnaire for cancer patients in palliative care. *Eur J Cancer* 2006; 42: 55-64.  
48  
49
- 50  
51 10. Kristjanson LJ. Validity and reliability testing of the FAMCARE Scale: measuring family  
52  
53 satisfaction with advanced cancer care. *Soc Sci Med* 1993; 36: 693-701.  
54  
55
- 56  
57 11. Chattat R, Ottoboni G, Zeneli A et al. The Italian version of the FAMCARE scale: a validation  
58  
59 study. *Support Care Cancer* 2016; 24: 3821-3830.  
60

12. Koller M, Aaronson NK, Blazeby J et al. Translation procedures for standardised quality of life questionnaires: The European Organisation for Research and Treatment of Cancer (EORTC) approach. *Eur J Cancer* 2007; 43: 1810-1820.
13. Brunelli C, Borreani C, Caraceni A et al. PATIENT VOICES, a project for the integration of the systematic assessment of patient reported outcomes and experiences within a comprehensive cancer center: a protocol for a mixed method feasibility study. *Health Qual Life Outcomes* 2020; 18: 252.
14. Machin D, Campbell M, Fayers P, Pinol A. *Sample Size Tables for Clinical Studies*, 2nd ed. 1997
15. Groenvold M, Petersen MA, Damkier A et al. Randomised clinical trial of early specialist palliative care plus standard care versus standard care alone in patients with advanced cancer: The Danish Palliative Care Trial. *Palliat Med* 2017; 31: 814-824.
16. Temel JS, Greer JA, Muzikansky A et al. Early palliative care for patients with metastatic non-small-cell lung cancer. *N Engl J Med* 2010; 363: 733-742.
17. Zimmermann C, Swami N, Krzyzanowska M et al. Early palliative care for patients with advanced cancer: a cluster-randomised controlled trial. *Lancet* 2014; 383: 1721-1730.
18. Maltoni M, Scarpi E, Dall'Agata M et al. Systematic versus on-demand early palliative care: A randomised clinical trial assessing quality of care and treatment aggressiveness near the end of life. *Eur J Cancer* 2016; 69: 110-118.
19. Temel JS, Greer JA, El-Jawahri A et al. Effects of Early Integrated Palliative Care in Patients With Lung and GI Cancer: A Randomized Clinical Trial. *J Clin Oncol* 2017; 35: 834-841.

- 1  
2  
3 20. Vanbutsele G, Pardon K, Van Belle S et al. Effect of early and systematic integration of palliative  
4 care in patients with advanced cancer: a randomised controlled trial. *Lancet Oncol* 2018; 19: 394-  
5 404.  
6  
7  
8  
9  
10  
11 21. Brims F, Gunatilake S, Lawrie I et al. Early specialist palliative care on quality of life for  
12 malignant pleural mesothelioma: a randomised controlled trial. *Thorax* 2019; 74: 354-361.  
13  
14  
15  
16 22. Scarpi E, Dall'Agata M, Zagonel V et al. Systematic vs. on-demand early palliative care in gastric  
17 cancer patients: a randomized clinical trial assessing patient and healthcare service outcomes.  
18 *Support Care Cancer* 2019; 27: 2425-2434.  
19  
20  
21  
22  
23  
24 23. Bakitas M, Lyons KD, Hegel MT et al. Effects of a palliative care intervention on clinical  
25 outcomes in patients with advanced cancer: the Project ENABLE II randomized controlled trial.  
26 *JAMA* 2009; 302: 741-749.  
27  
28  
29  
30  
31  
32  
33 24. Bakitas MA, Tosteson TD, Li Z et al. Early Versus Delayed Initiation of Concurrent Palliative  
34 Oncology Care: Patient Outcomes in the ENABLE III Randomized Controlled Trial. *J Clin Oncol*  
35 2015; 33: 1438-1445.  
36  
37  
38  
39  
40  
41 25. Tattersall M, Martin A, Devine R et al. Early contact with palliative care services: a randomised  
42 trial in patients with newly detected incurable metastatic cancer. 2014  
43  
44  
45  
46 26. McCorkle R, Jeon S, Ercolano E et al. An Advanced Practice Nurse Coordinated Multidisciplinary  
47 Intervention for Patients with Late-Stage Cancer: A Cluster Randomized Trial. *J Palliat Med*  
48 2015; 18: 962-969.  
49  
50  
51  
52  
53  
54 27. Hui D, Mori M, Watanabe SM et al. Referral criteria for outpatient specialty palliative cancer care:  
55 an international consensus. *The Lancet Oncology* 2016; 17: e552-e559.  
56  
57  
58  
59  
60

- 1  
2  
3 28. Kaasa S, Loge JH, Aapro M et al. Integration of oncology and palliative care: a Lancet Oncology  
4  
5 Commission. *Lancet Oncol* 2018; 19: e588-e653.  
6  
7
- 8  
9 29. Hannon B, Swami N, Rodin G et al. Experiences of patients and caregivers with early palliative  
10  
11 care: A qualitative study. *Palliat Med* 2017; 31: 72-81.  
12  
13
- 14  
15 30. Hoerger M, Greer JA, Jackson VA et al. Defining the Elements of Early Palliative Care That Are  
16  
17 Associated With Patient-Reported Outcomes and the Delivery of End-of-Life Care. *J Clin Oncol*  
18  
19 2018; 36: 1096-1102.  
20  
21
- 22  
23 31. Costantini M, Apolone G, Tanzi S et al. Is early integration of palliative care feasible and  
24  
25 acceptable for advanced respiratory and gastrointestinal cancer patients? A phase 2 mixed-  
26  
27 methods study. *Palliat Med* 2018; 32: 46-58.  
28  
29
- 30  
31 32. Wentlandt K, Krzyzanowska MK, Swami N et al. Referral practices of oncologists to specialized  
32  
33 palliative care. *Journal of clinical Oncology* 2012; 30: 4380-4386.  
34  
35
- 36  
37 33. Ullgren H, Kirkpatrick L, Kilpelainen S, Sharp L. Working in silos? - Head & Neck cancer  
38  
39 patients during and after treatment with or without early palliative care referral. *Eur J Oncol Nurs*  
40  
41 2017; 26: 56-62.  
42  
43
- 44  
45 34. Lally K, Chua IS, Lin NU et al. Using Quality Improvement to Increase Access to Palliative Care.  
46  
47 *JCO Oncol Pract* 2021; 17: 107-110.  
48  
49
- 50  
51 35. Mayland CR, Ho QM, Doughty HC et al. The palliative care needs and experiences of people with  
52  
53 advanced head and neck cancer: A scoping review. *Palliat Med* 2021; 35: 27-44.  
54  
55
- 56  
57 36. Salins N, Ghoshal A, Hughes S, Preston N. How views of oncologists and haematologists impacts  
58  
59 palliative care referral: a systematic review. *BMC Palliat Care* 2020; 19: 175-020-00671-5.  
60

- 1  
2  
3 37. Kayastha N, LeBlanc TW. When to Integrate Palliative Care in the Trajectory of Cancer Care.  
4  
5 Curr Treat Options Oncol 2020; 21: 41-020-00743-x.  
6  
7  
8  
9 38. Silva TH, Peres WAF, Rosa KSDC et al. Advanced Stage of Disease and Systemic Inflammation  
10  
11 as Factors Associated With Referral of Patients With Colorectal Cancer to a Palliative Care Unit.  
12  
13 Am J Hosp Palliat Care 2020; 37: 859-865.  
14  
15  
16  
17 39. Ostgathe C, Wendt KN, Heckel M et al. Identifying the need for specialized palliative care in adult  
18  
19 cancer patients - development and validation of a screening procedure based on proxy assessment  
20  
21 by physicians and filter questions. BMC Cancer 2019; 19: 646-019-5809-8.  
22  
23  
24  
25 40. Glare PA, Chow K. Validation of a Simple Screening Tool for Identifying Unmet Palliative Care  
26  
27 Needs in Patients With Cancer. J Oncol Pract 2015; 11: e81-6.  
28  
29  
30  
31 41. Zalenski R, Courage C, Edelen A et al. Evaluation of screening criteria for palliative care  
32  
33 consultation in the MICU: a multihospital analysis. BMJ Support Palliat Care 2014; 4: 254-262.  
34  
35  
36  
37 42. Milnes S, Orford NR, Berkeley L et al. A prospective observational study of prevalence and  
38  
39 outcomes of patients with Gold Standard Framework criteria in a tertiary regional Australian  
40  
41 Hospital. BMJ Support Palliat Care 2019; 9: 92-99.  
42  
43  
44  
45 43. Meffert C, Rucker G, Hatami I, Becker G. Identification of hospital patients in need of palliative  
46  
47 care--a predictive score. BMC Palliat Care 2016; 15: 21-016-0094-7.  
48  
49  
50  
51 44. Flaherty C, Fox K, McDonah D, Murphy J. Palliative Care Screening: Appraisal of a tool to  
52  
53 identify patients' symptom management and advance care planning needs. Clin J Oncol Nurs  
54  
55 2018; 22  
56  
57  
58  
59  
60

- 1  
2  
3 45. Lambert S, Bellamy T, Girgis A. Routine assessment of unmet needs in individuals with advanced  
4  
5 cancer and their caregivers: A qualitative study of the palliative care needs assessment tool (PC-  
6  
7 NAT). *J Psychosoc Oncol* 2018; 36: 82-96.  
8  
9  
10  
11 46. Molin Y, Gallay C, Gautier J et al. PALLIA-10, a screening tool to identify patients needing  
12  
13 palliative care referral in comprehensive cancer centers: A prospective multicentric study  
14  
15 (PREPA-10). *Cancer medicine* 2019; 8: 2950-2961.  
16  
17  
18  
19 47. Marshall TF, Alfano CM, Sleight AG et al. Consensus-building efforts to identify best tools for  
20  
21 screening and assessment for supportive services in oncology. *Disabil Rehabil* 2020; 42: 2178-  
22  
23 2185.  
24  
25  
26  
27 48. Carrasco-Zafra MI, Gómez-García R, Ocaña-Riola R et al. Level of Palliative Care Complexity in  
28  
29 Advanced Cancer Patients: A Multinomial Logistic Analysis. *J Clin Med* 2020; 9: 1960. doi:  
30  
31 10.3390/jcm9061960.  
32  
33  
34  
35 49. Le QV, Trinh HL, Mai KNT et al. Screening Patients With Cancer Admitted to Hanoi Medical  
36  
37 University Hospital for Palliative Care Needs. *JCO Global Oncology* 2020; 6: 1321-1327.  
38  
39  
40  
41 50. Kwon JH, Baek SK, Kim DY et al. Pilot study for the Psychometric Validation of the Sheffield  
42  
43 Profile for Assessment and Referral to Care (SPARC) in Korean Cancer Patients. *Cancer Res*  
44  
45 *Treat* 2021; 53: 25-31.  
46  
47  
48  
49 51. Paiva CE, Paiva BSR, Menezes D et al. Development of a screening tool to improve the referral of  
50  
51 patients with breast and gynecological cancer to outpatient palliative care. *Gynecol Oncol* 2020;  
52  
53 158: 153-157.  
54  
55  
56  
57 52. Dudgeon D. The impact of measuring patient-reported outcome measures on quality of and access  
58  
59 to palliative care. *J Palliat Med* 2018; 21: S-76-S-80.  
60

- 1  
2  
3 53. Kamal AH, Bausewein C, Casarett DJ et al. Standards, Guidelines, and Quality Measures for  
4  
5 Successful Specialty Palliative Care Integration Into Oncology: Current Approaches and Future  
6  
7 Directions. *J Clin Oncol* 2020; 38: 987-994.  
8  
9  
10  
11 54. Hui D, Anderson L, Tang M et al. Examination of referral criteria for outpatient palliative care  
12  
13 among patients with advanced cancer. *Supportive Care in Cancer* 2020; 28: 295-301.  
14  
15  
16  
17 55. Singh S, Rodriguez A, Lee D et al. Usefulness of the surprise question on an inpatient oncology  
18  
19 service. *American Journal of Hospice and Palliative Medicine®* 2018; 35: 1421-1425.  
20  
21  
22  
23 56. Rauenzahn SL, Schmidt S, Aduba IO et al. Integrating palliative care services in ambulatory  
24  
25 oncology: an application of the Edmonton Symptom Assessment System. *Journal of oncology*  
26  
27 *practice* 2017; 13: e401-e407.  
28  
29  
30  
31 57. Beeler PE, Bates DW, Hug BL. Clinical decision support systems. *Swiss Med Wkly* 2014; 144:  
32  
33 w14073.  
34  
35  
36  
37 58. De Conno F, Ripamonti C, Caraceni A, Saita L. Palliative care at the National Cancer Institute of  
38  
39 Milan. *Supportive care in cancer* 2001; 9: 141-147.  
40  
41  
42  
43 59. Caraceni A, Lo Dico S, Zecca E et al. Outpatient palliative care and thoracic medical oncology:  
44  
45 Referral criteria and clinical care pathways. *Lung Cancer* 2020; 139: 13-17.  
46  
47  
48  
49  
50  
51  
52  
53  
54  
55  
56  
57  
58  
59  
60

1  
2  
3  
4  
5  
6  
7  
8  
9  
10  
11  
12  
13  
14  
15  
16  
17  
18  
19  
20  
21  
22  
23  
24  
25  
26  
27  
28  
29  
30  
31  
32  
33  
34  
35  
36  
37  
38  
39  
40  
41  
42  
43  
44  
45  
46  
47  
48  
49  
50  
51  
52  
53  
54  
55  
56  
57  
58  
59  
60



Figure 1: Project scheme

254x190mm (96 x 96 DPI)
